# Supplementary material for: Asymmetric Architecture toward Waveform Encoding for Motion Perception in Perovskite Photodetectors
Source: Research Square preprint supplement (doi:10.21203/rs.3.rs-8576382/v1), 2026-02-17
Supplement: Supplementary file 1 [file dd6dc9017e3e11f0f386e811.docx]

**Asymmetric architecture toward waveform encoding for motion perception in perovskite photodetectors**

### **Authors**

Yang Shi1, Qingqi Chen1, Hao Xiong1, Lin Xiao1, Yi Zhu1,Wei Ren1, Zhilong He2,Leilei Gu1,3,4*

### **Affiliations**

1Qingyuan Research Institute, School of Computer Science, Shanghai Jiao Tong University, Shanghai, China.

2School of Chemistry and Chemical Engineering, Shanghai Jiao Tong University, Shanghai, China.

3Shanghai Artificial Intelligence Laboratory, Shanghai, China.

4National Key Laboratory of Advanced Micro and Nano Manufacture Technology, Shanghai Jiao Tong University.

### *Corresponding author

Correspondence and requests for materials should be addressed to Leilei Gu.

*Email: leilei.gu@sjtu.edu.cn (Leilei Gu).

### **Keywords**: Motion perception, Waveform encoding, Optical flow estimation, Perovskite photodetector

This PDF file includes:

Supplementary Figures 1-13 (page 2-14)

Supplementary Tables 1 (page 15)

Supplementary Note 1 (page 16-17)

Supplementary Reference (page 18)


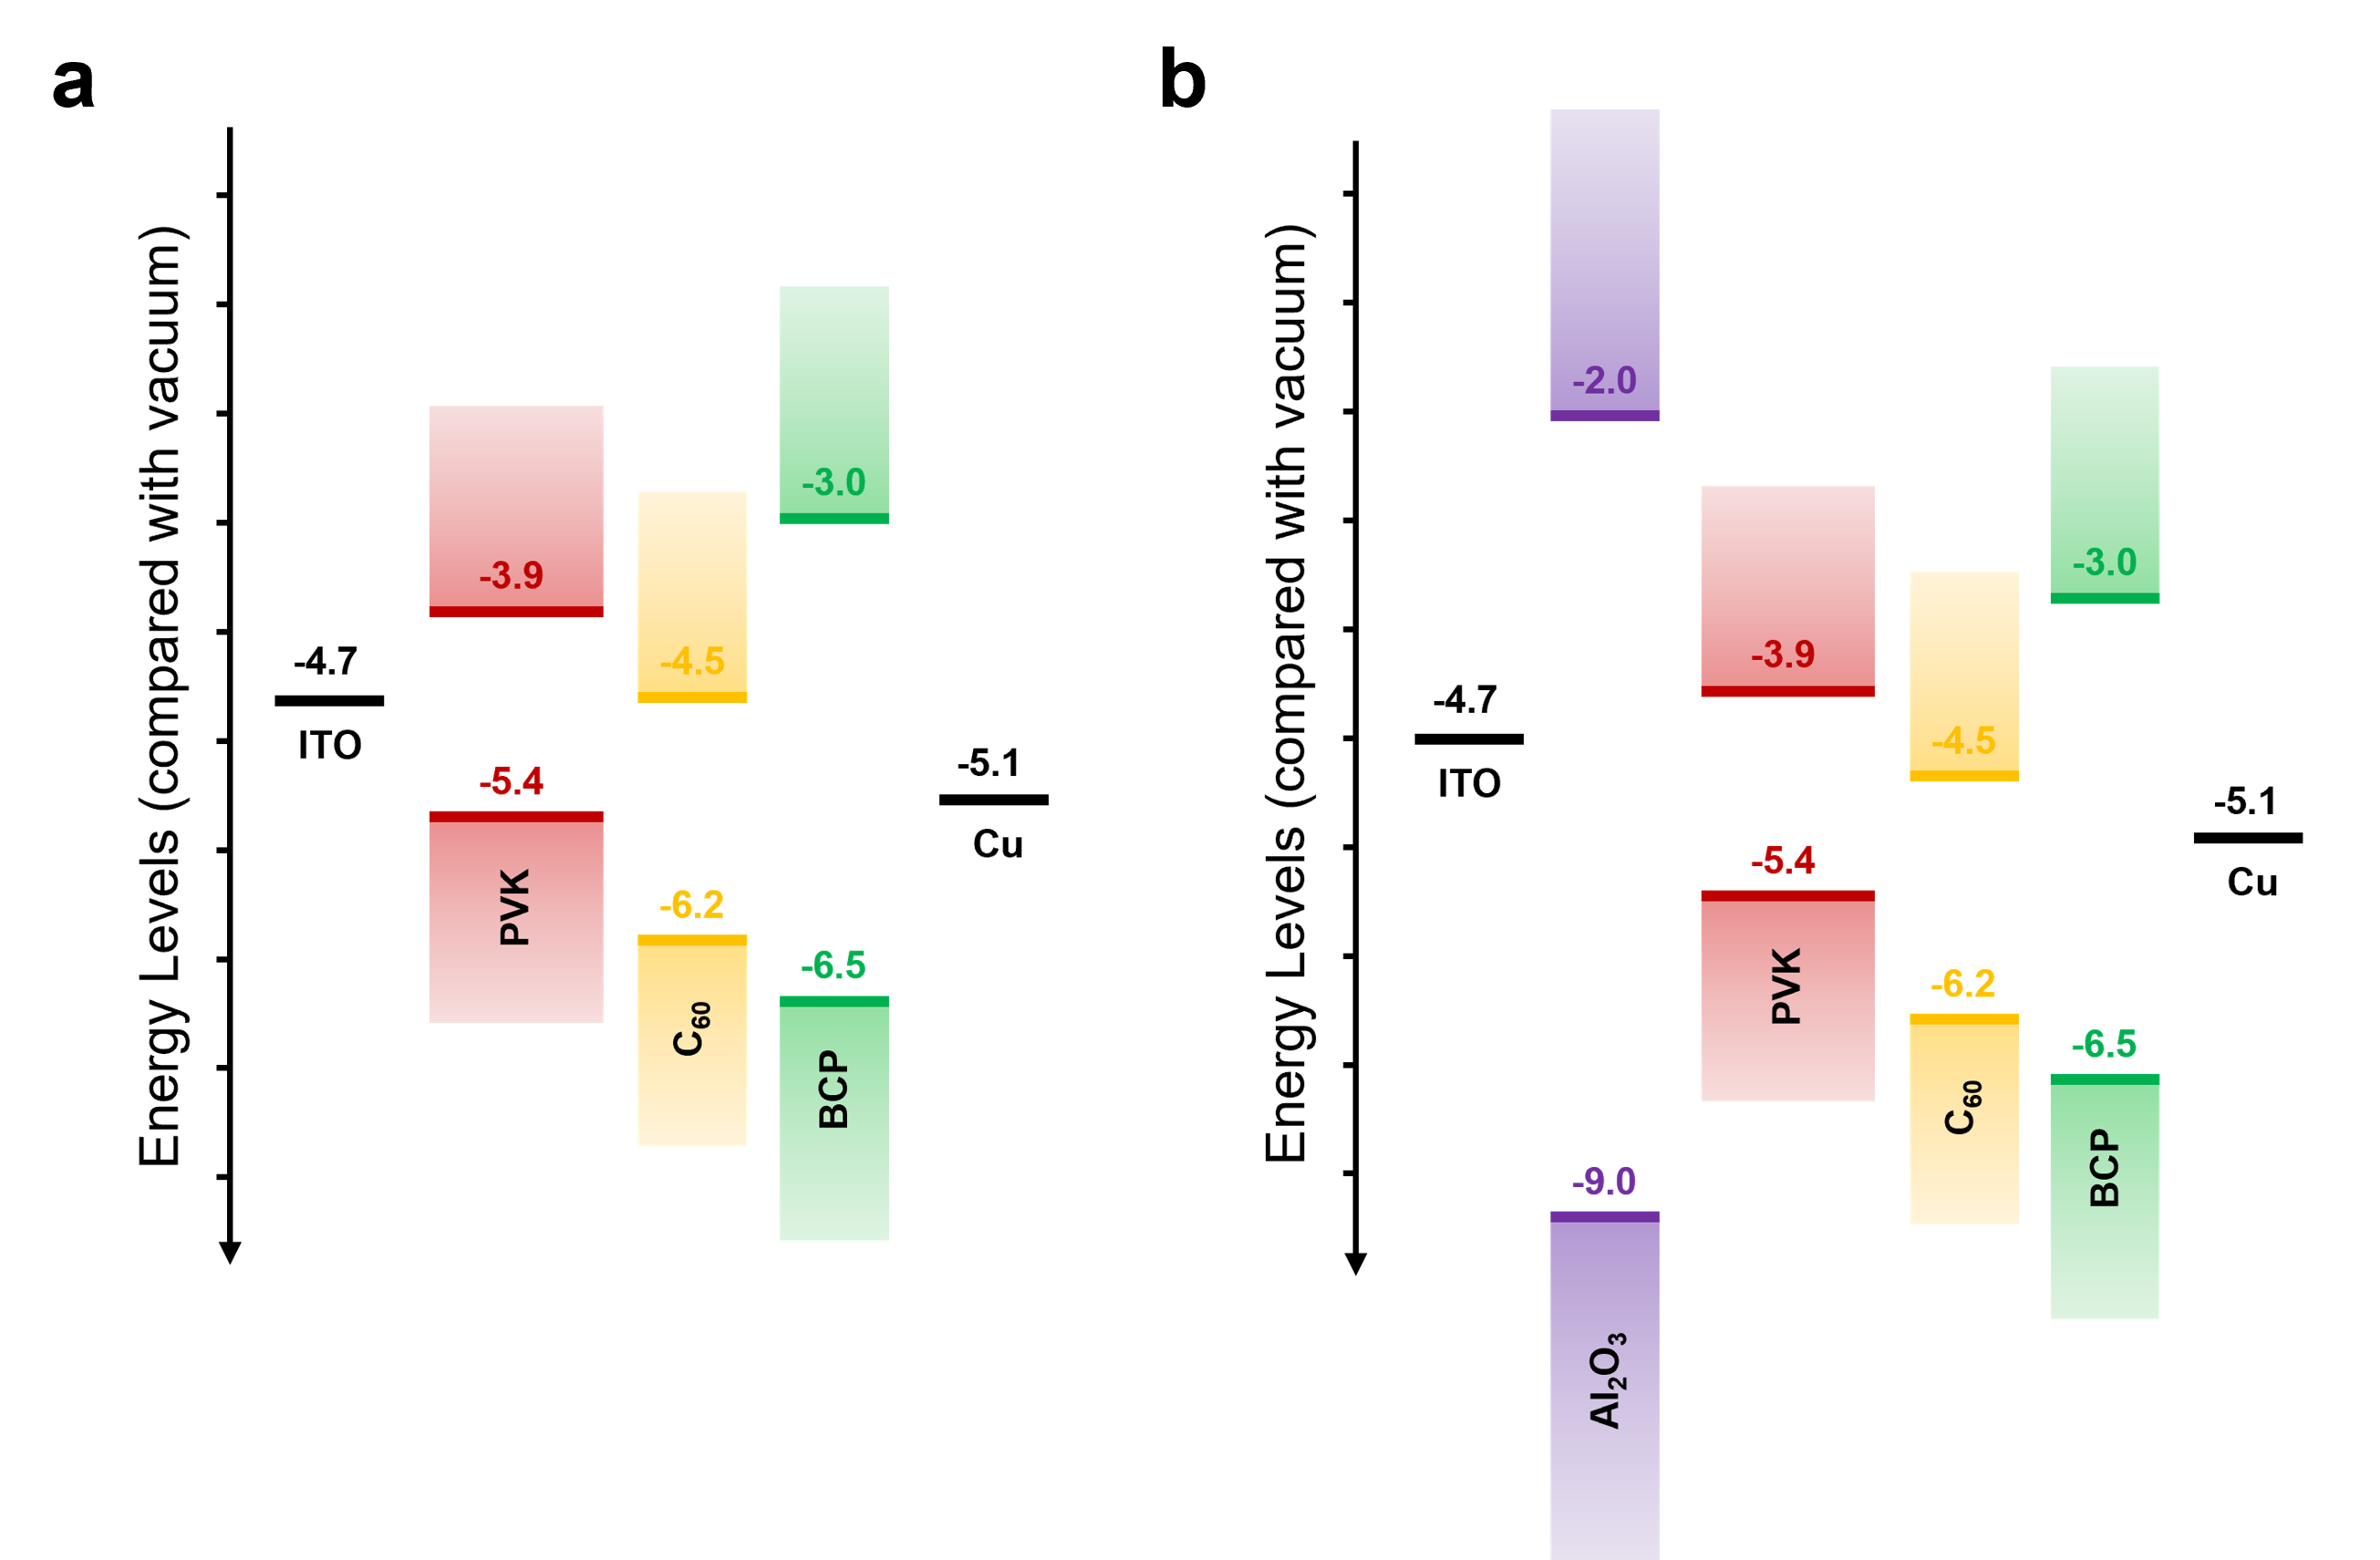


**Supplementary Fig 1. Energy band diagrams.** The inverted MAPbI3 based photodetectors with the configuration of (a) ITO/perovskite/C60/BCP/Cu and (b) ITO/Al2O3/perovskite/C60/BCP/Cu, respectively.


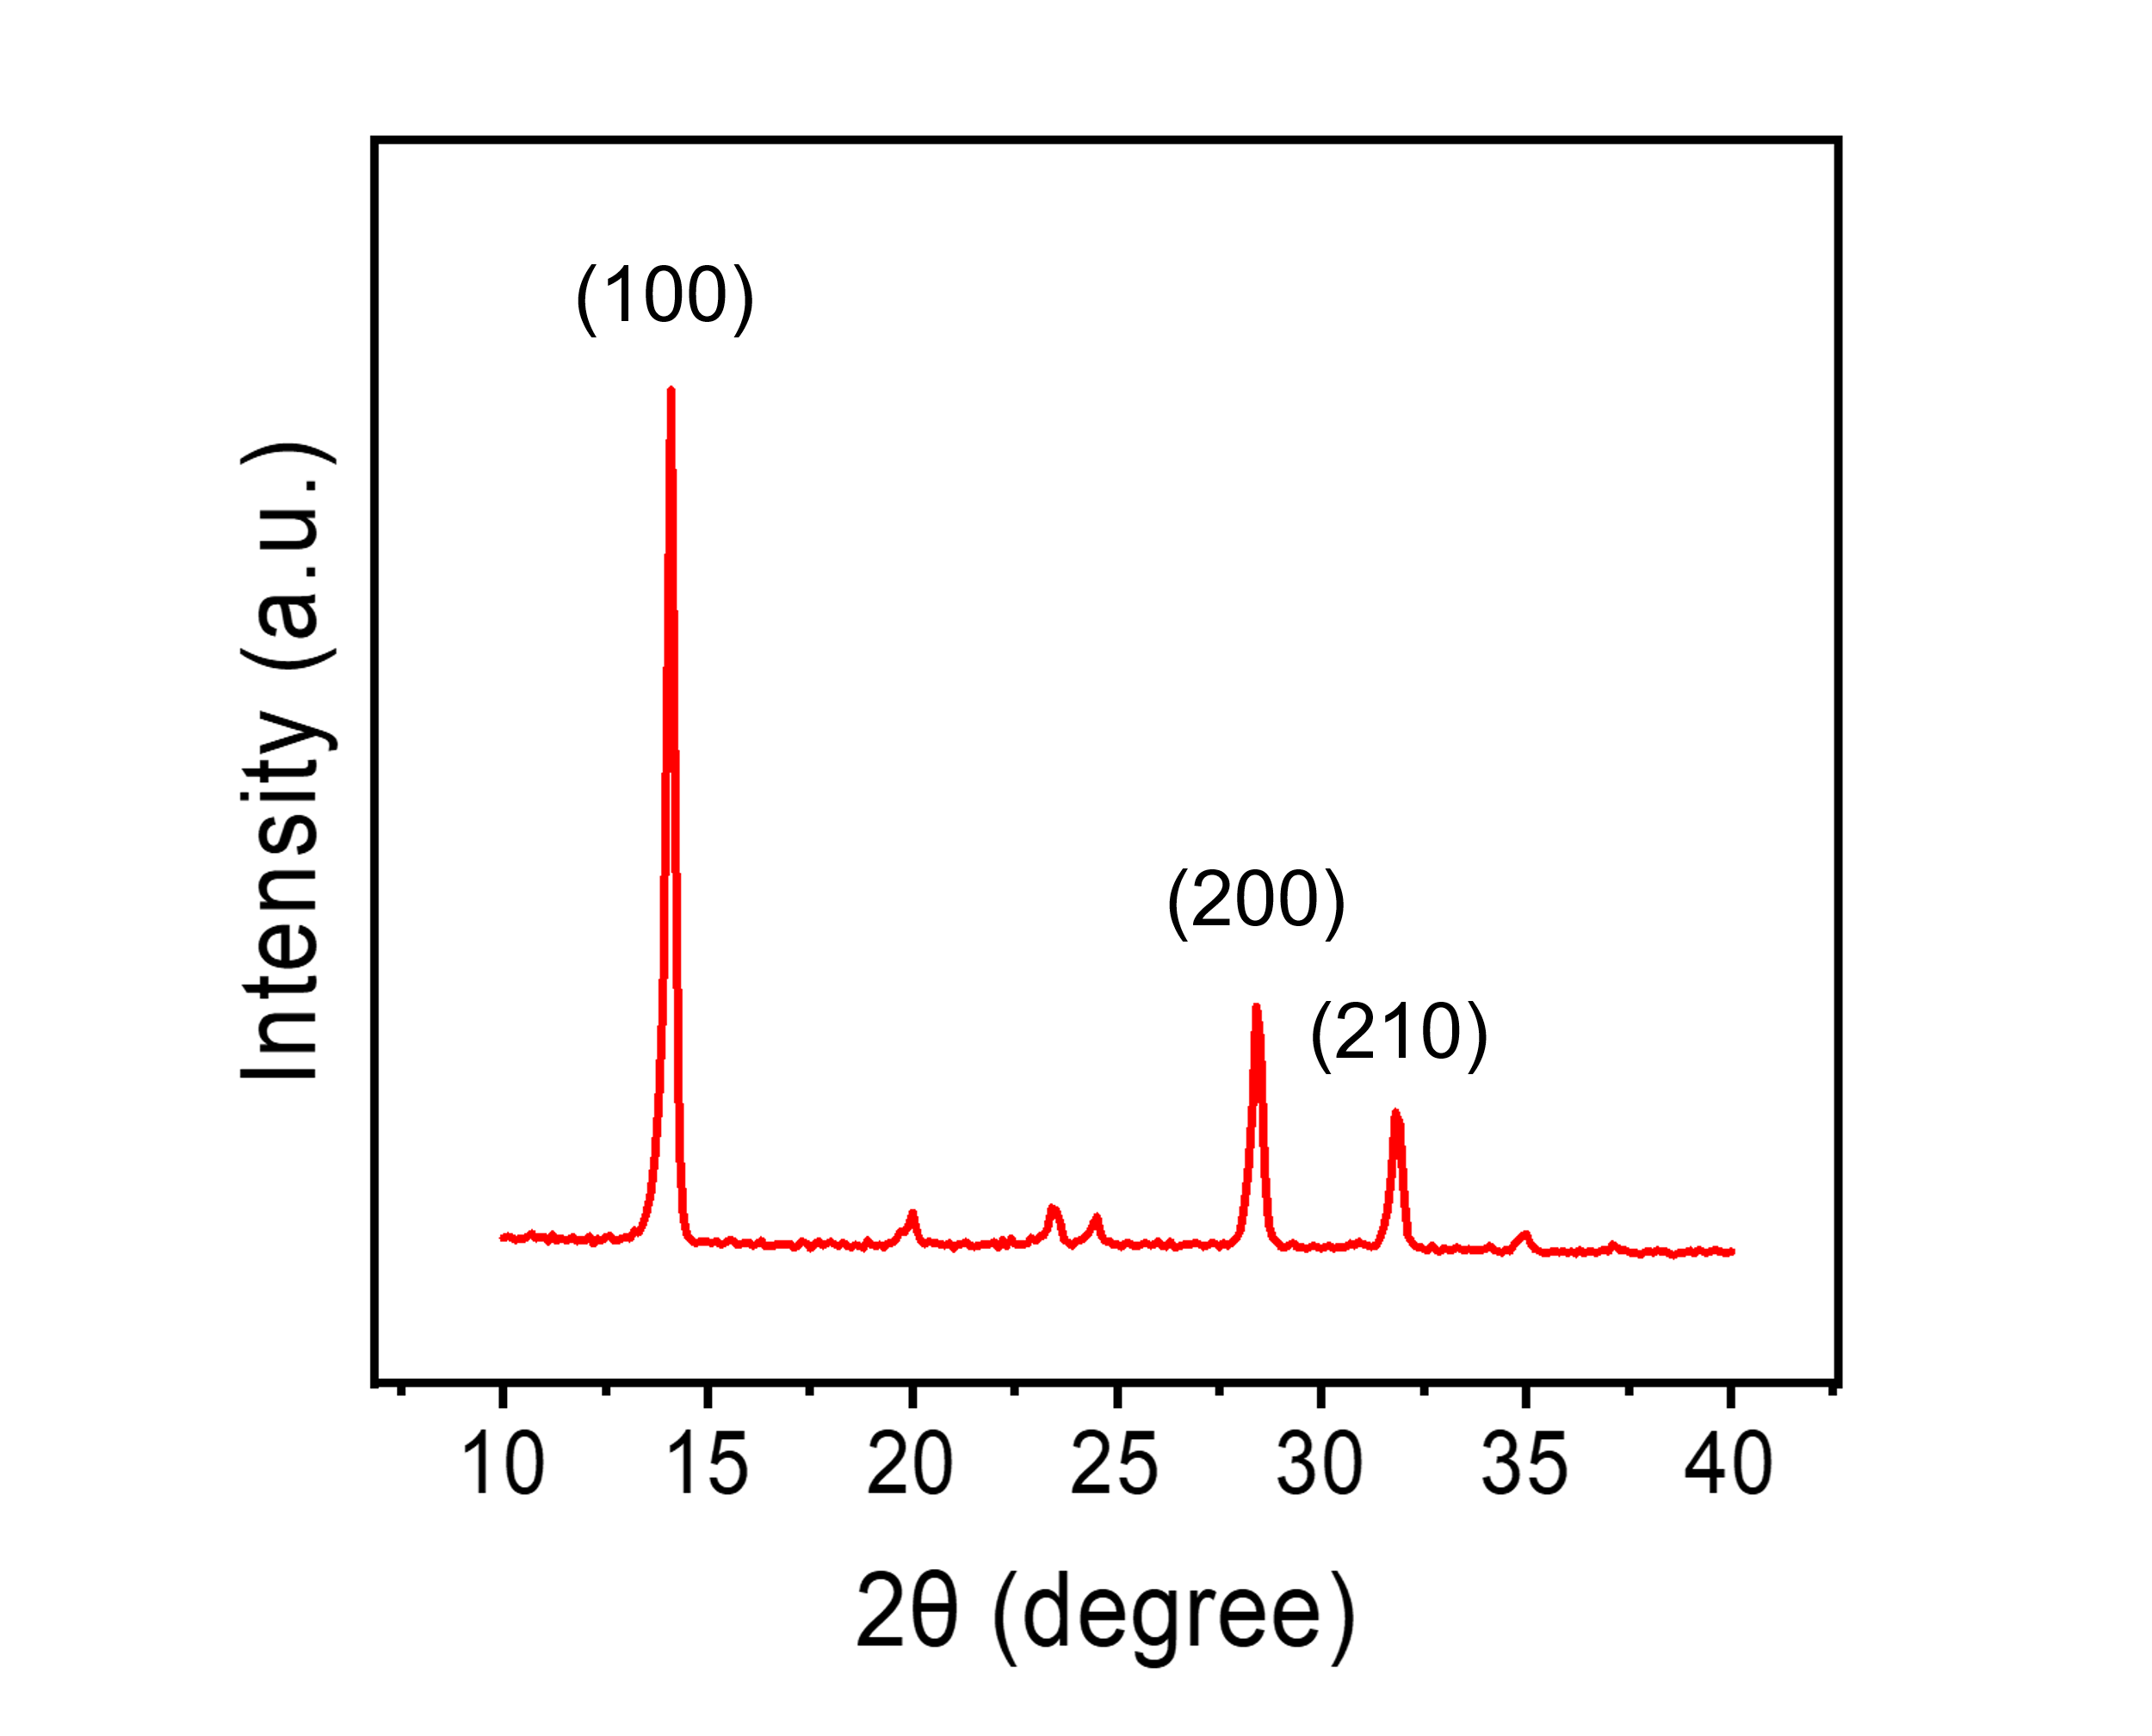


**Supplementary Fig 2. Crystallinity characterization.** XRD pattern of MAPbI3 film prepared from perovskite precursor solution.


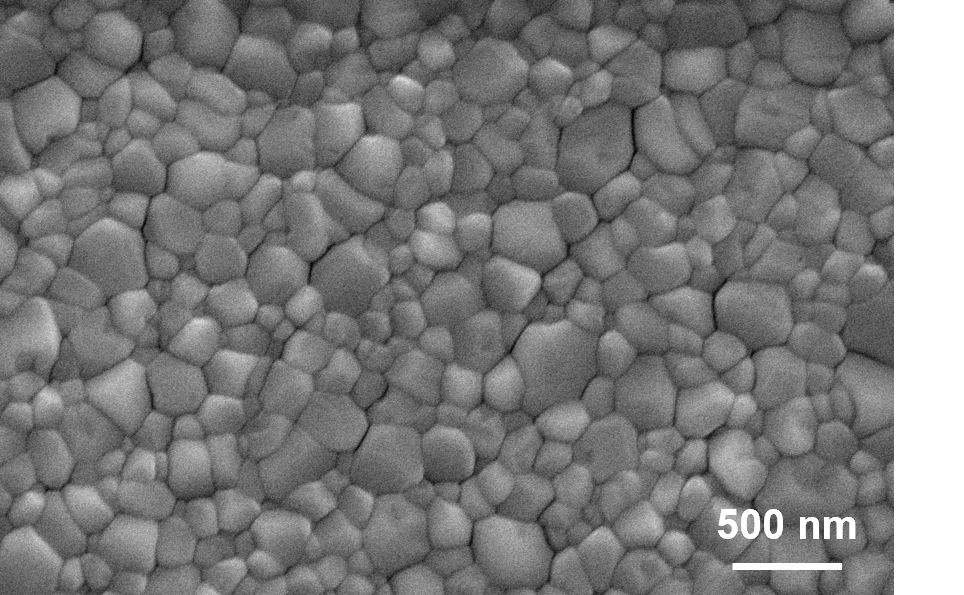


**Supplementary Fig 3. Morphology characterization.** Top-view SEM image of MAPbI3 films deposited on the ITO layer.


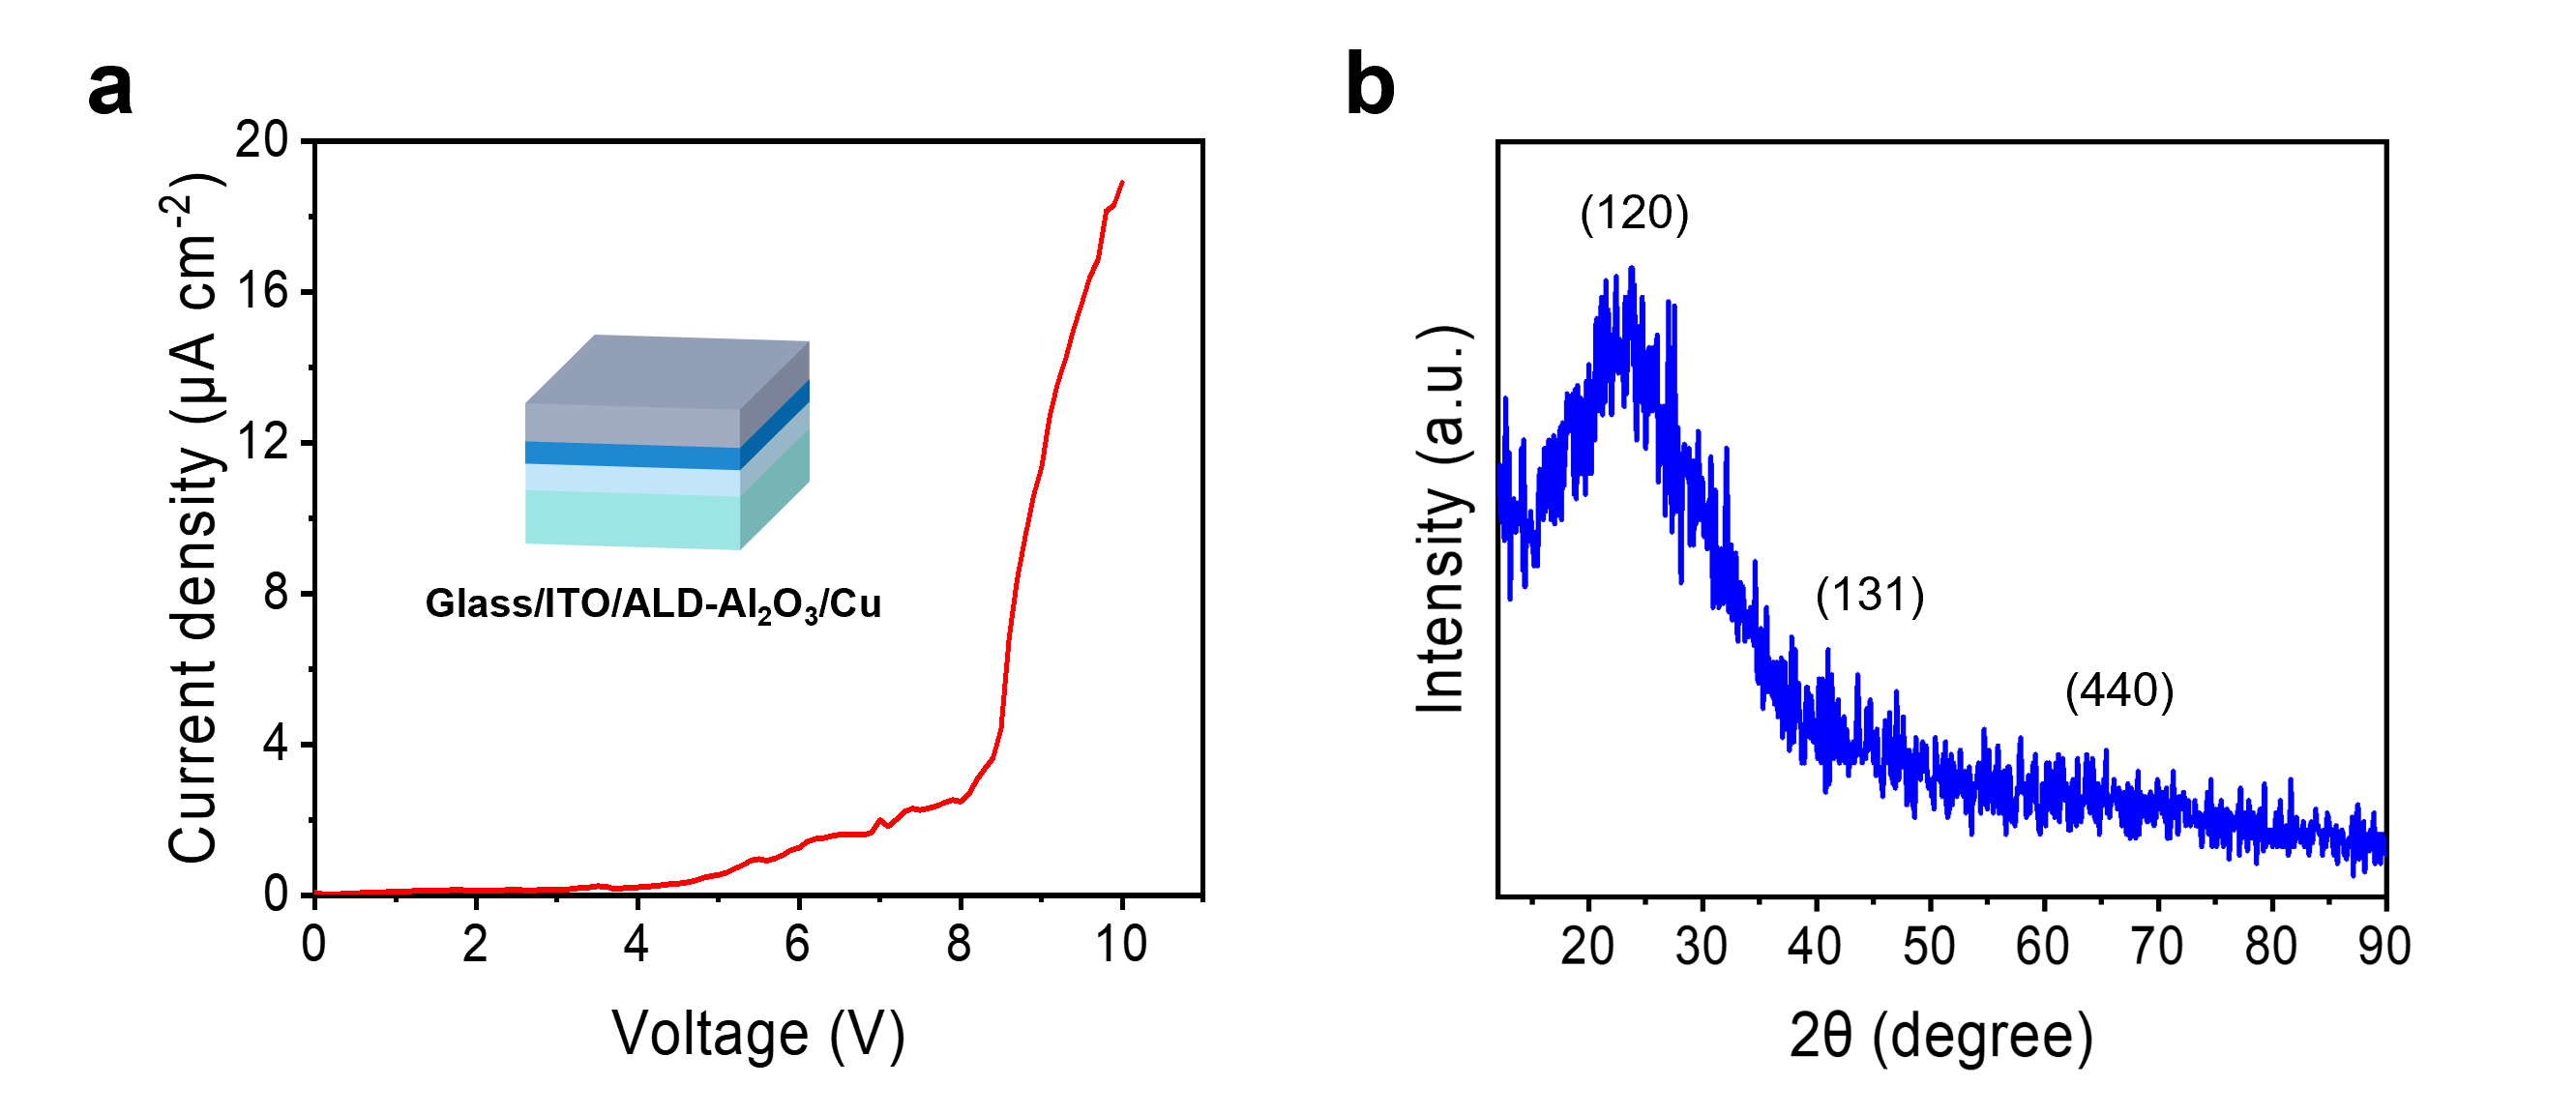


**Supplementary Fig 4. Characterization of leakage current and crystallinity.** (a) J–V characteristics and (b) XRD pattern of Al2O3 film deposited by atomic layer deposition (ALD).


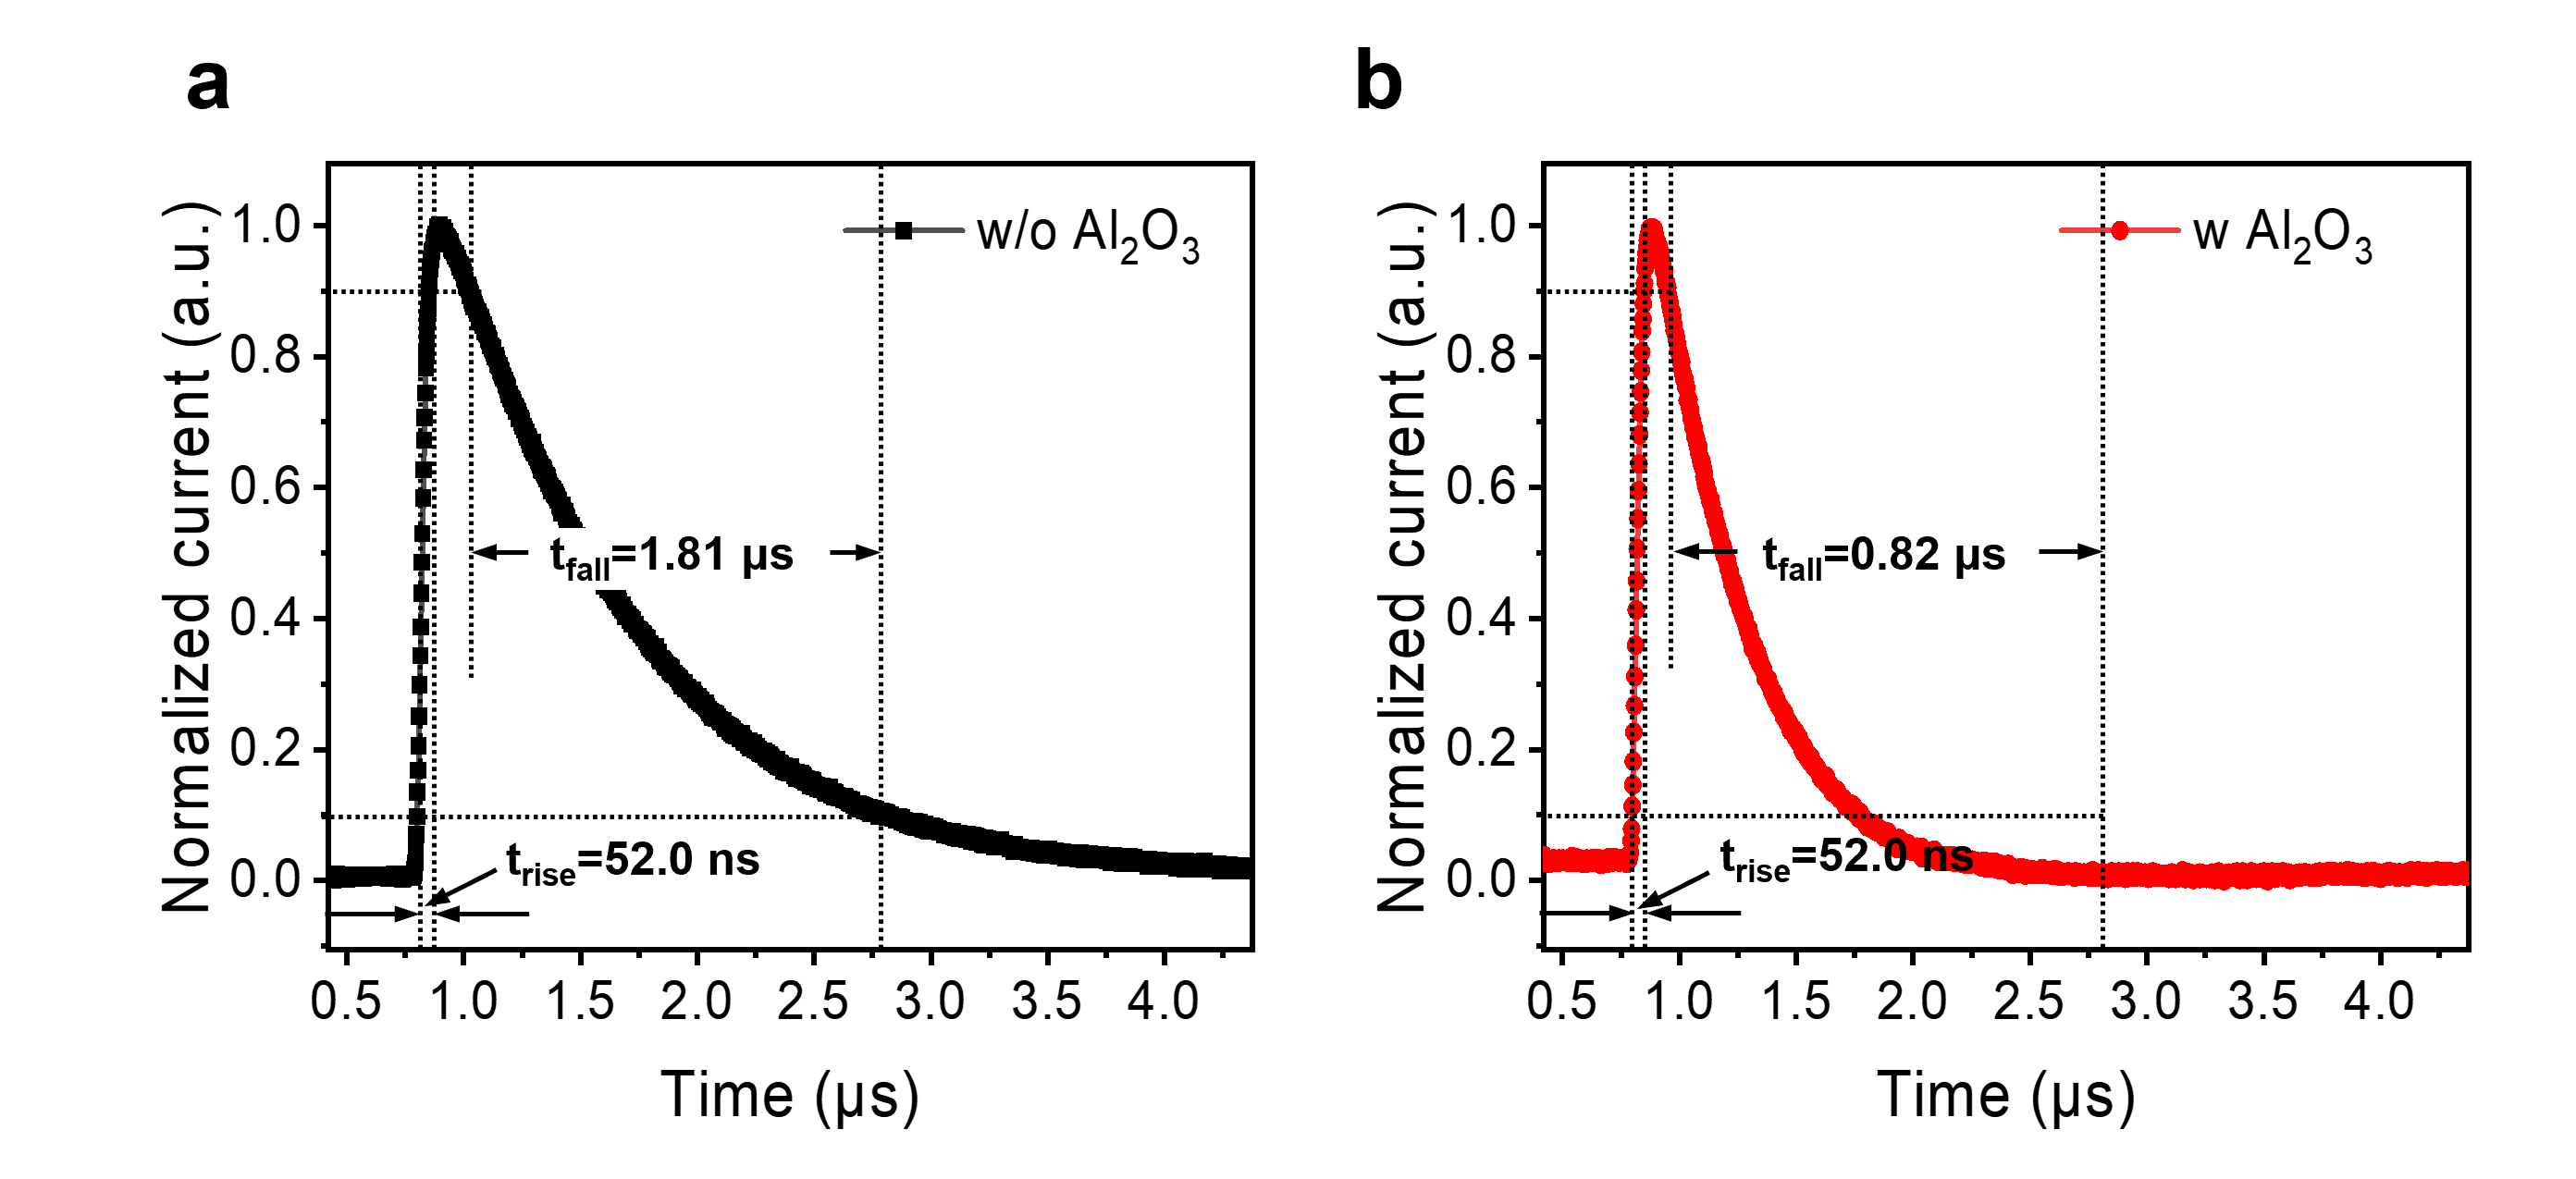


**Supplementary Fig 5. Response time measurements.** (a-b) TPC curves of the MAPbI3 photodetectors with and without the Al2O3 layer, respectively.


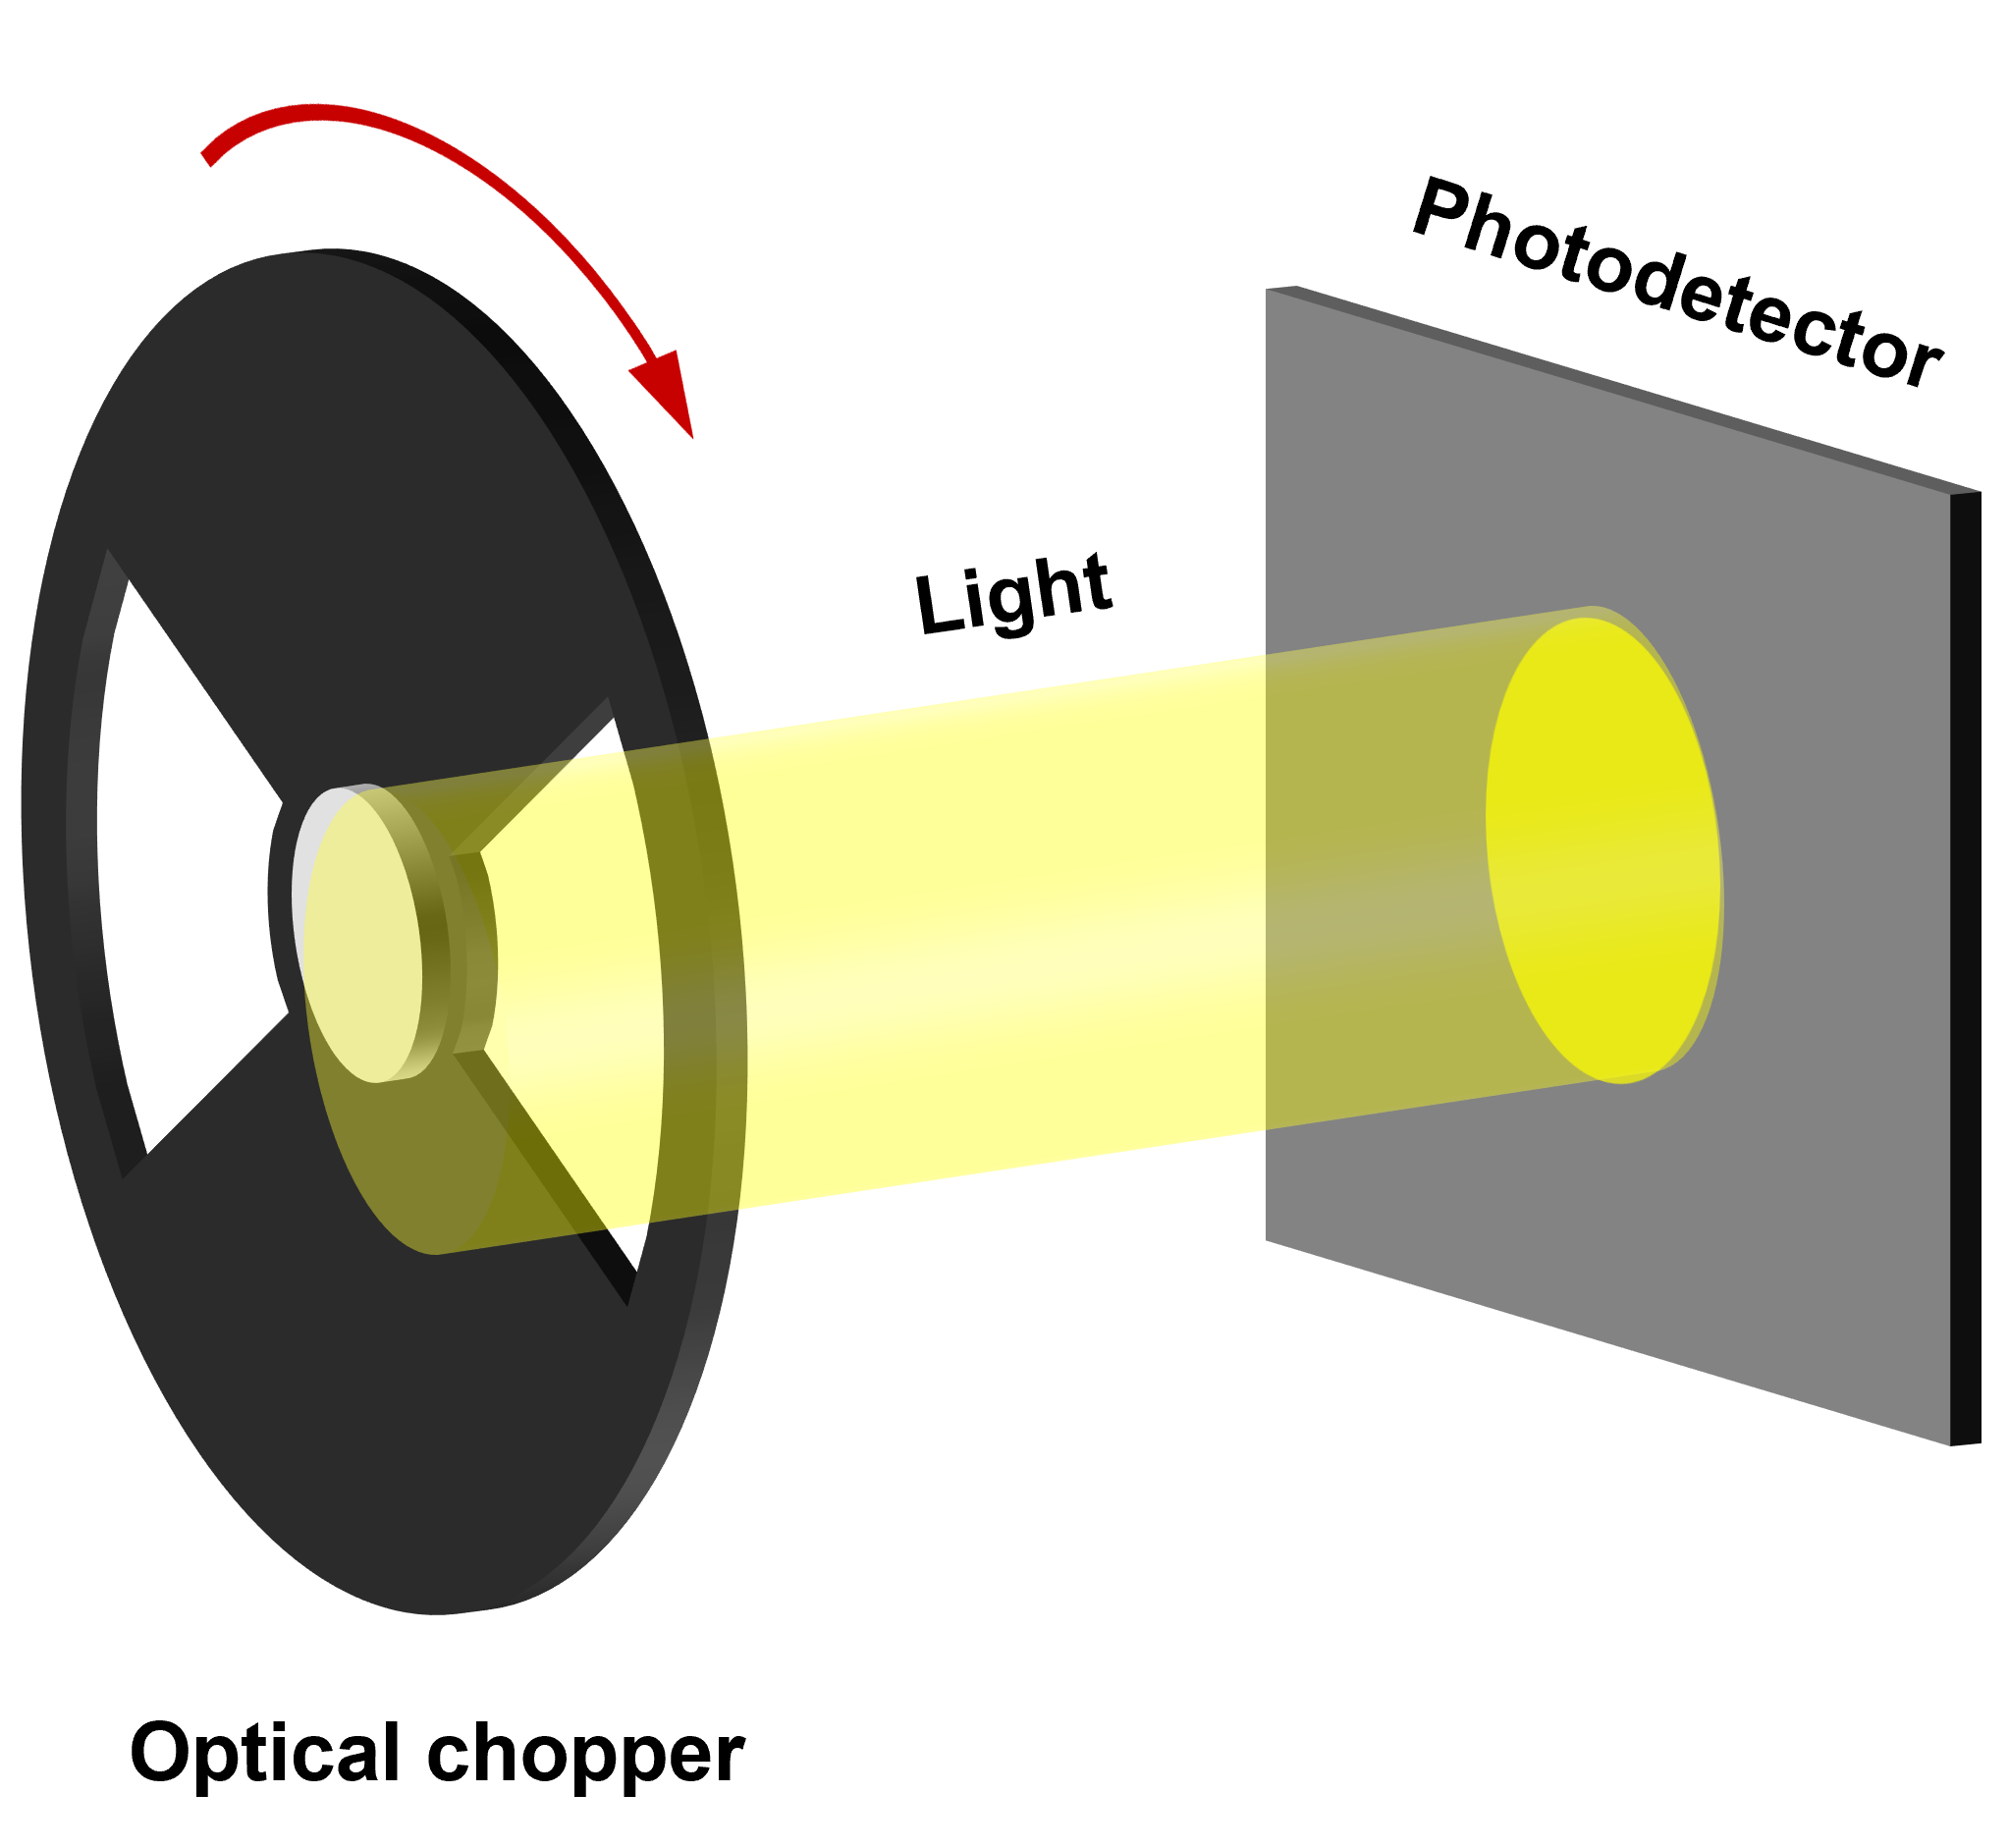


**Supplementary Fig 6. Optical chopper setup.** Illustration of speed and direction measurement based on the MAPbI3 photodetector.


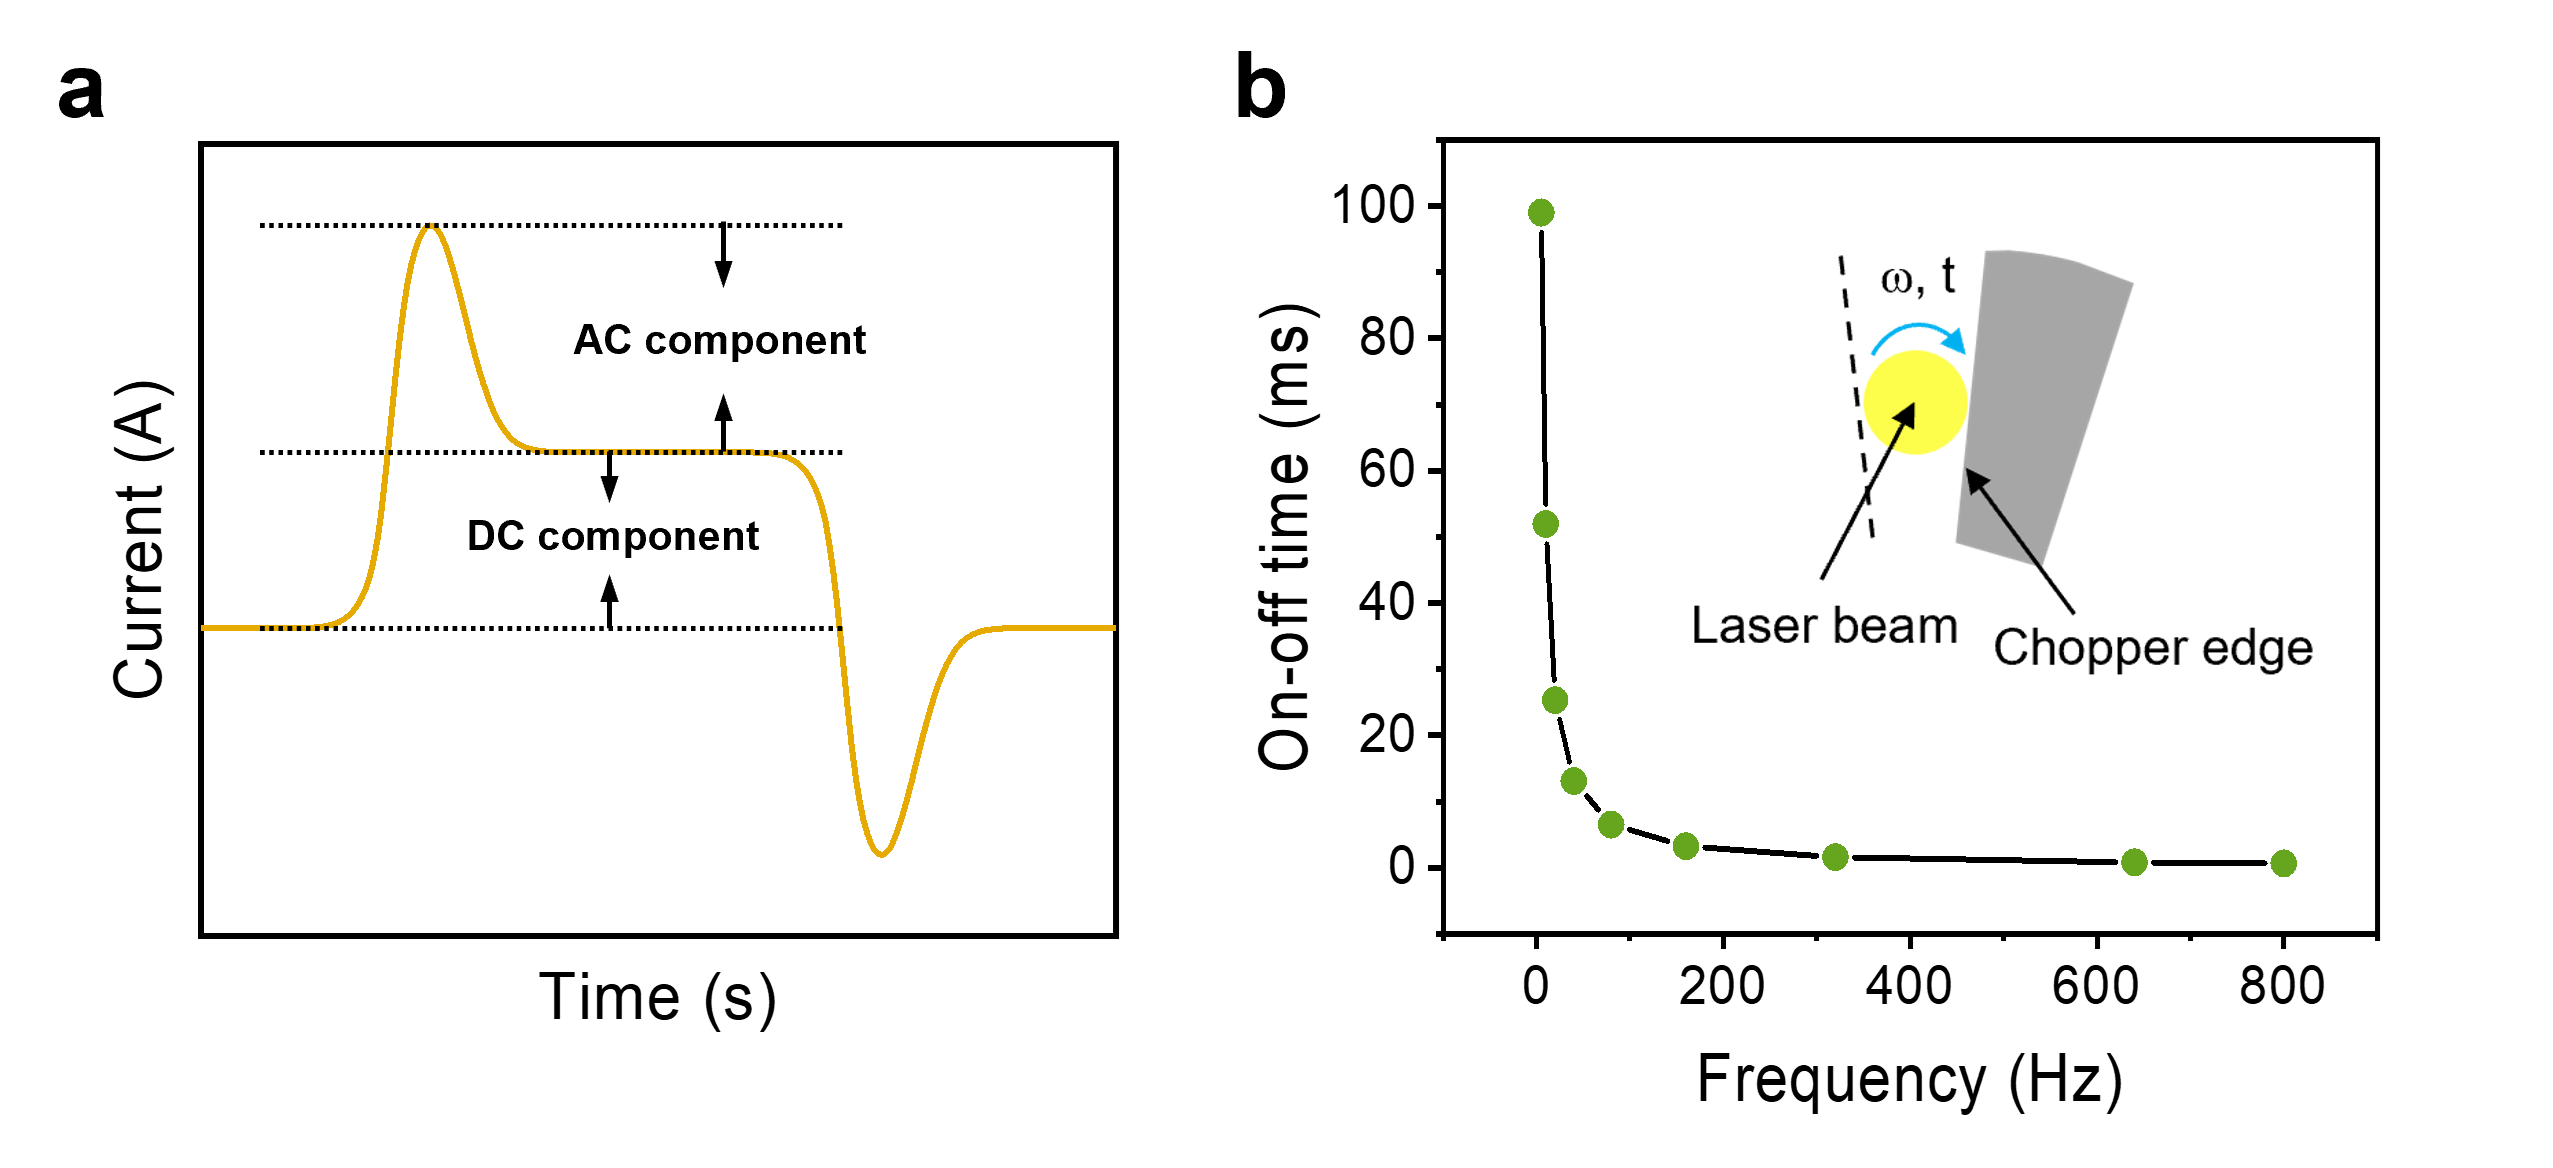


**Supplementary Fig 7.** (a) A representative photocurrent response curve. (b) The relationship of the frequency with on-off time.


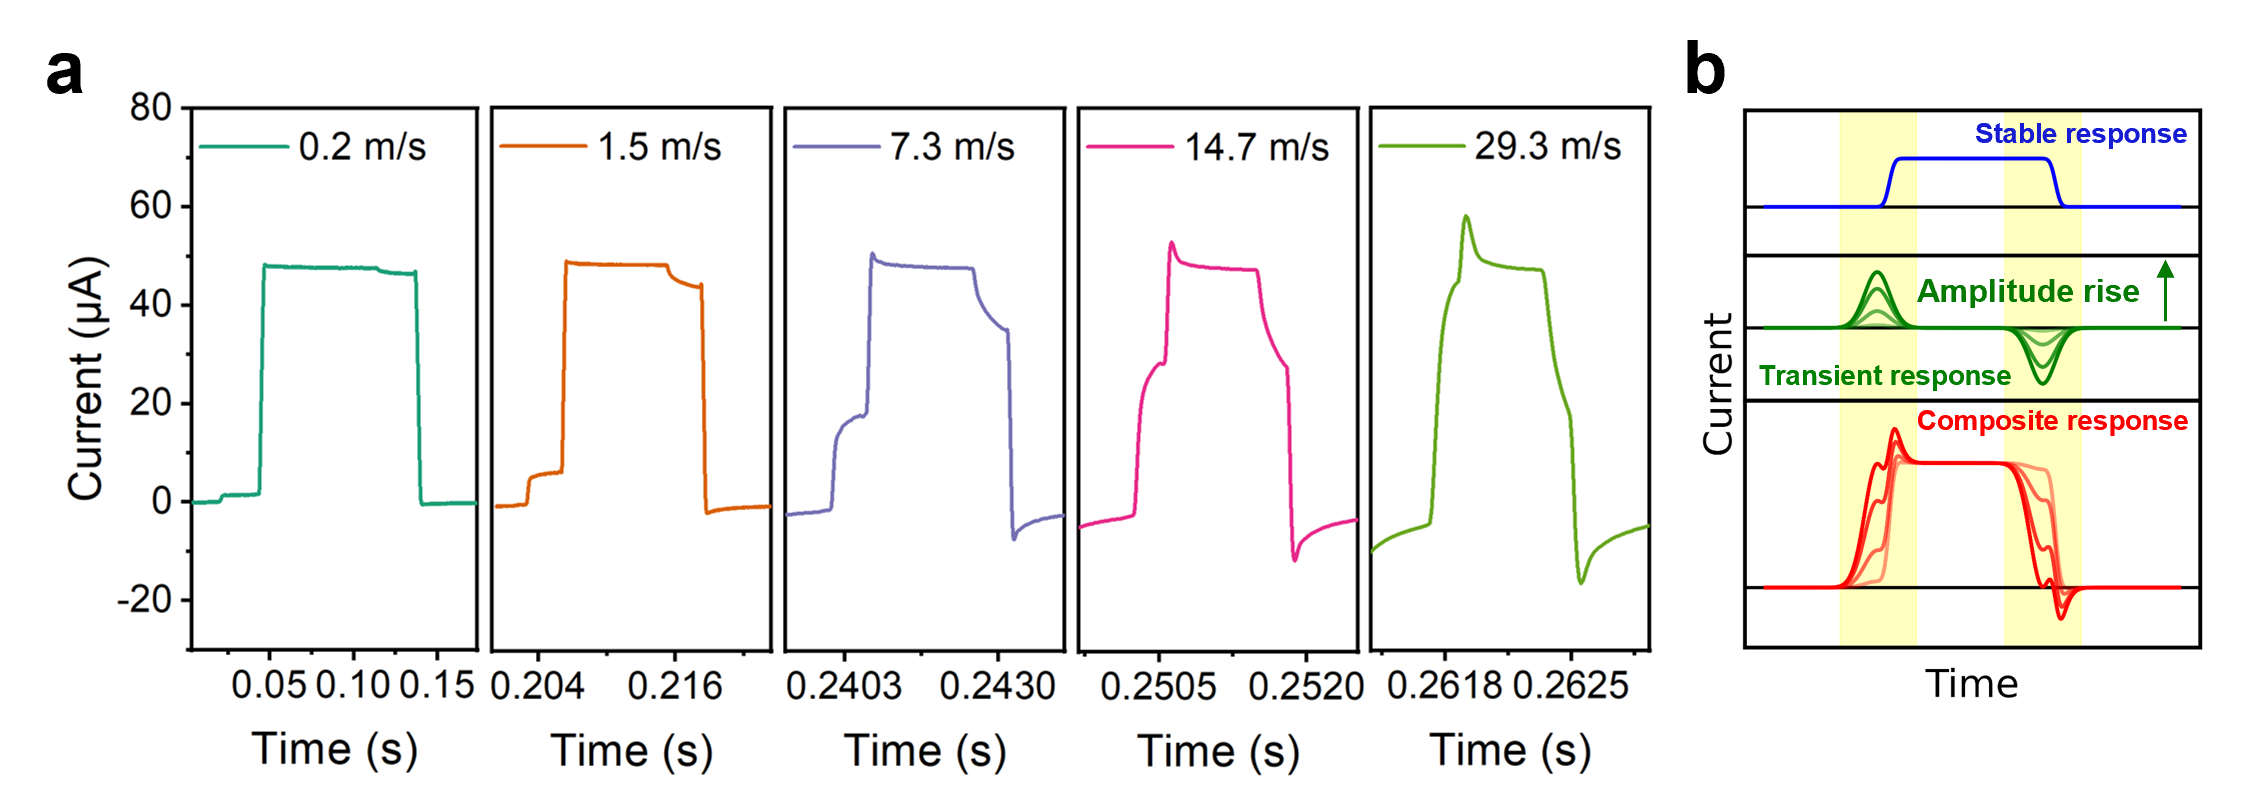


**Supplementary Fig 8. Mechanism of Speed Perception.** (a) Photocurrent waveforms of the perovskite photodetector at different motion speeds under a fixed motion direction of 180°, and (b) schematic illustration of their evolution.

**Supplementary Fig 9. Typical response curves of the hybrid-type photodetector.** The photocurrent response of the device under varying light intensity, motion speed, and direction.


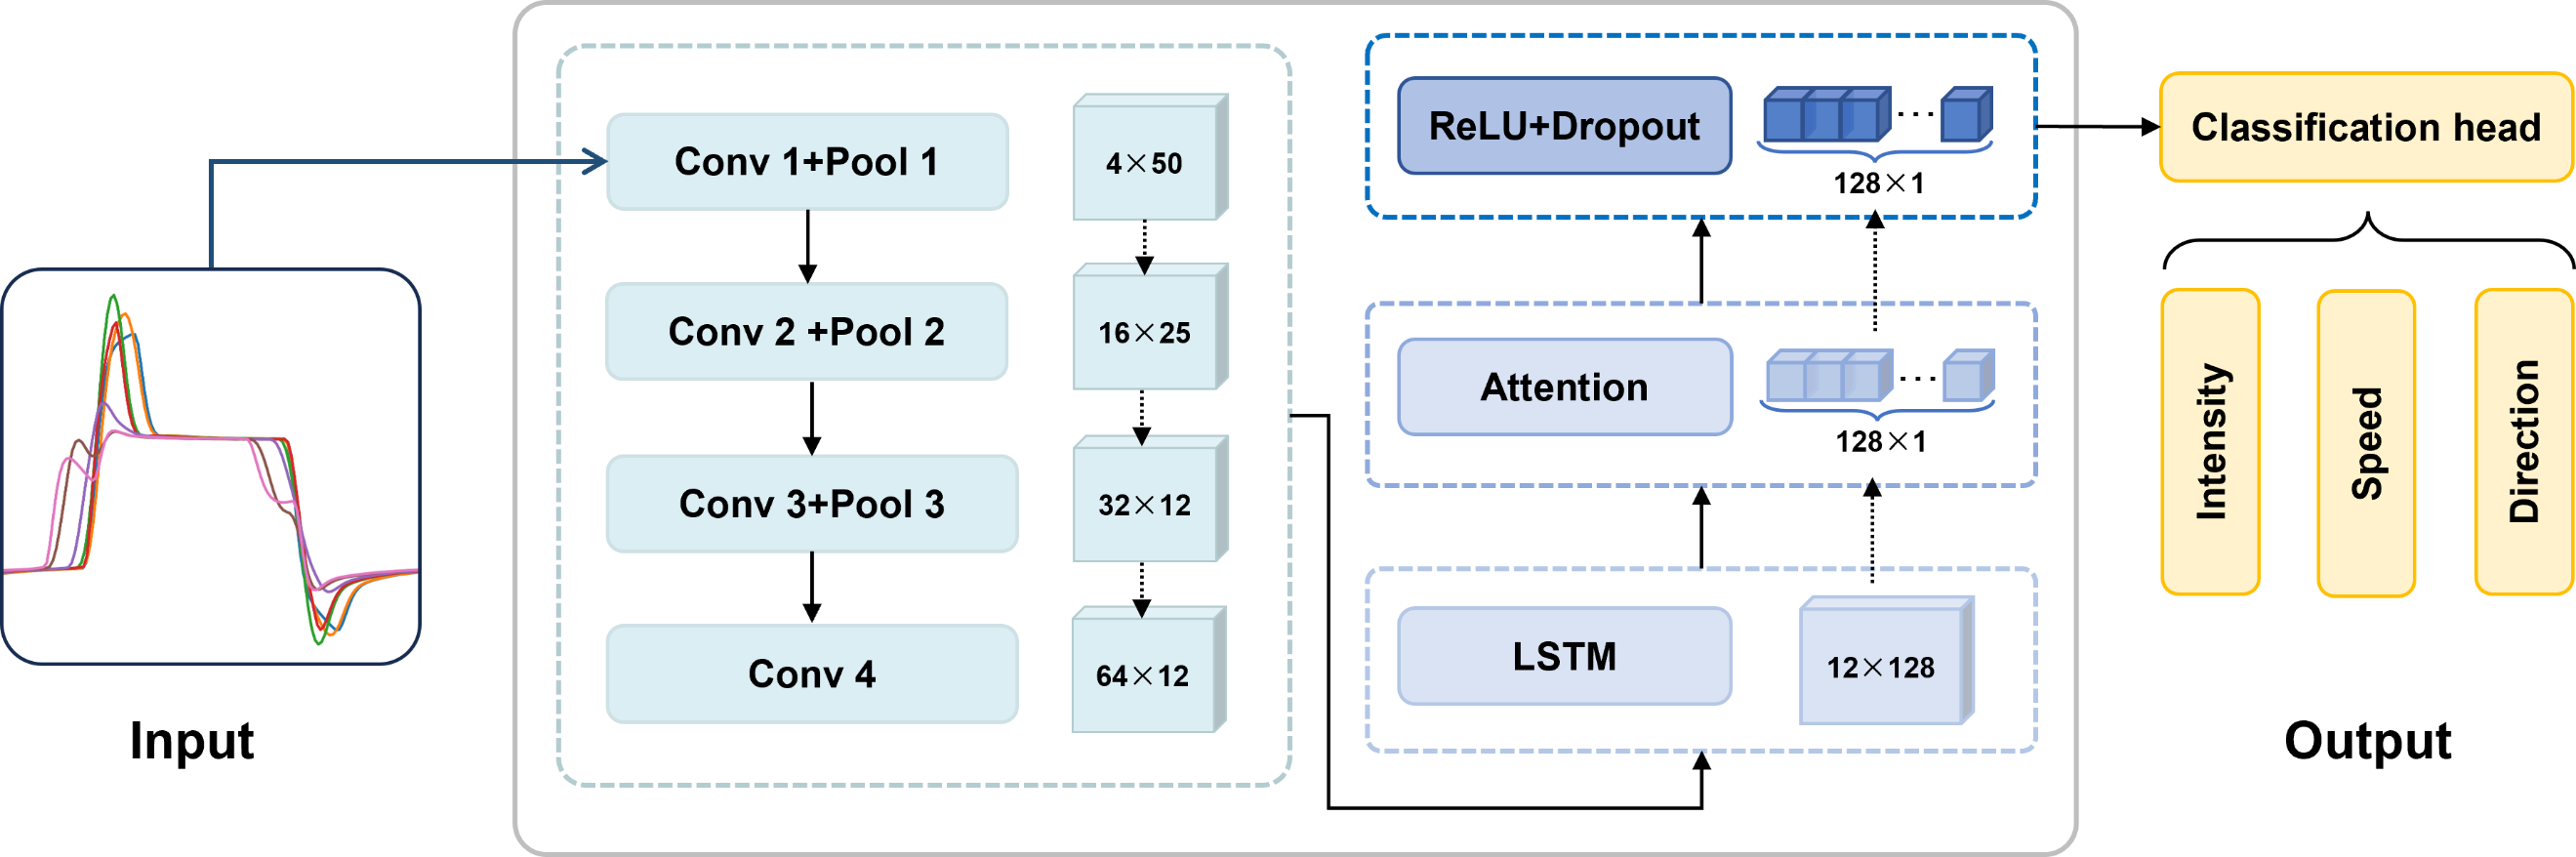


**Supplementary Fig 10. Schematic illustration of the neural network.** The model consists of four convolutional layers with pooling (Conv 1–Conv 4), followed by an LSTM and an attention mechanism for temporal feature extraction. A ReLU with Dropout layer and a classification head are applied to generate outputs corresponding to light intensity, motion speed, and direction.


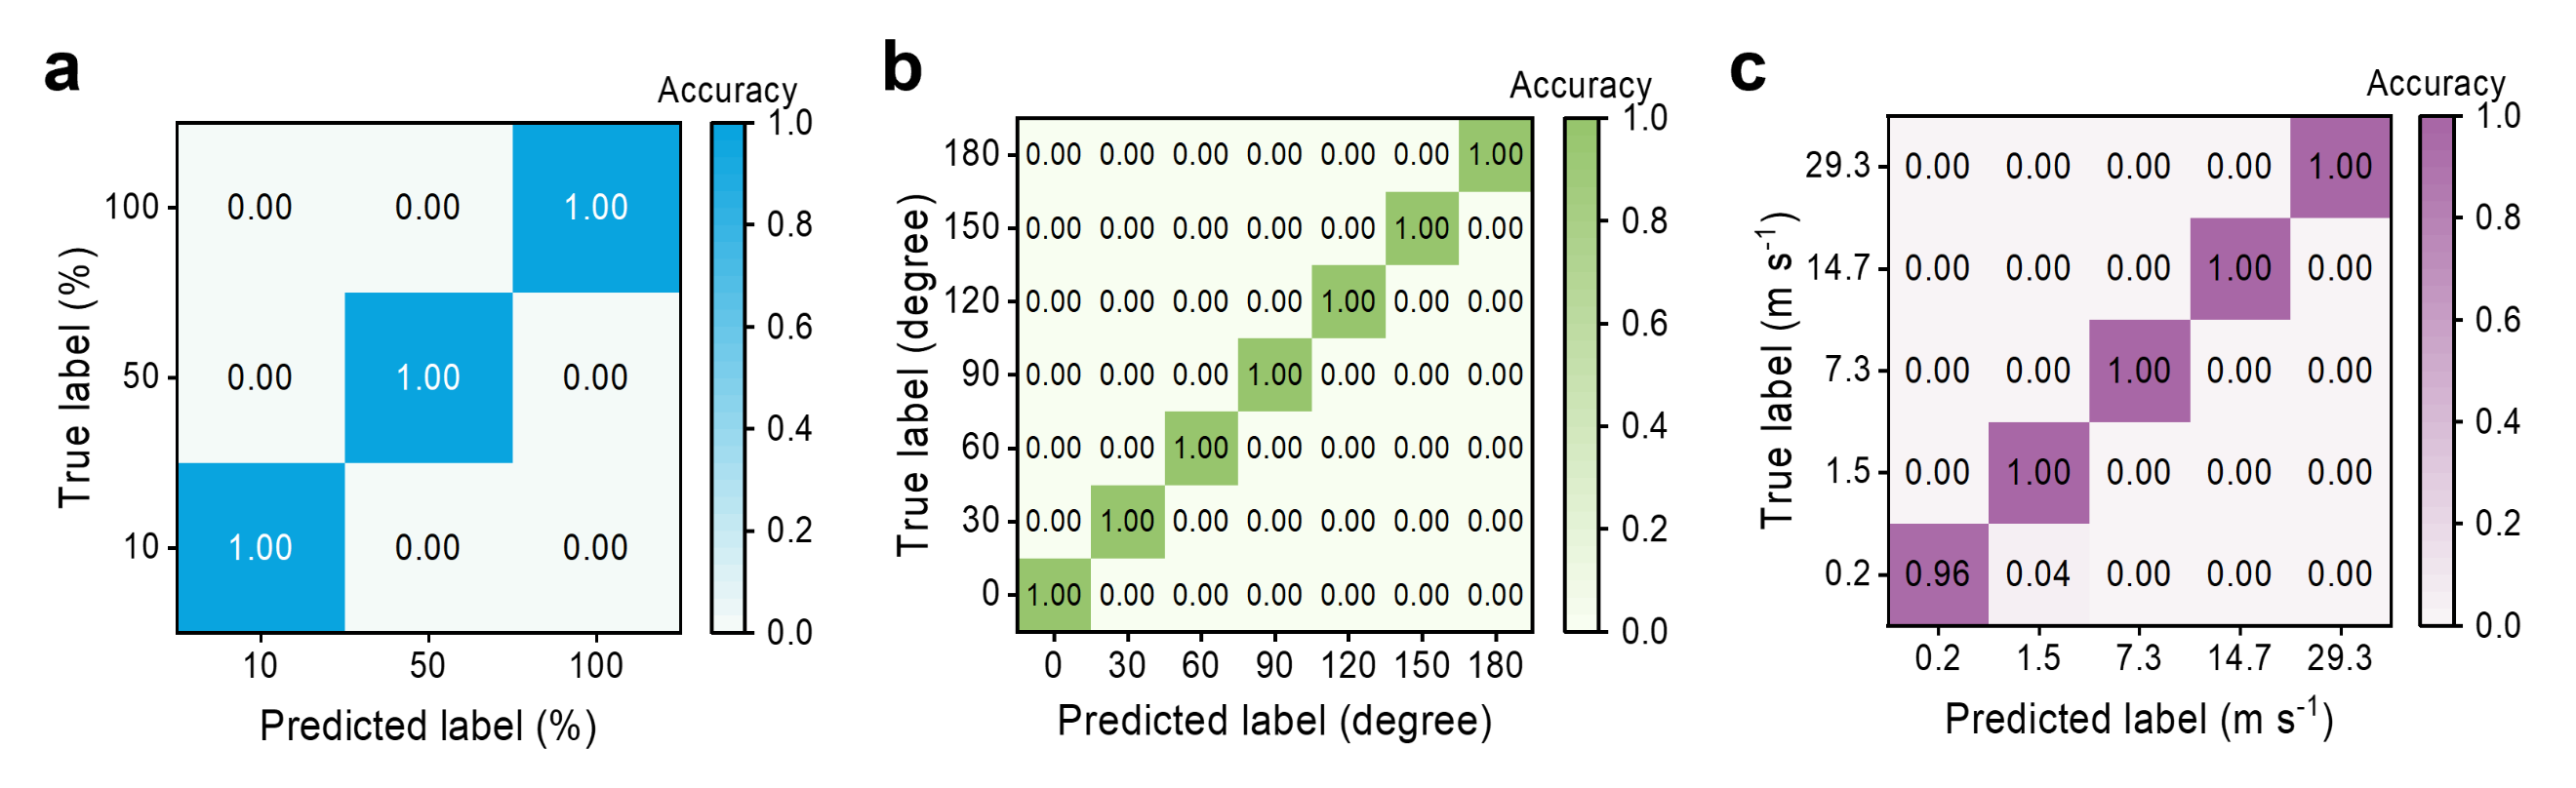


**Supplementary Fig 11. Validation of the trained model on additional photocurrent data** **acquired after 6 h interval.** Confusion matrices of the trained neural network model for recognizing (a) light intensity, (b) motion direction, and (c) speed based on photocurrent waveforms.


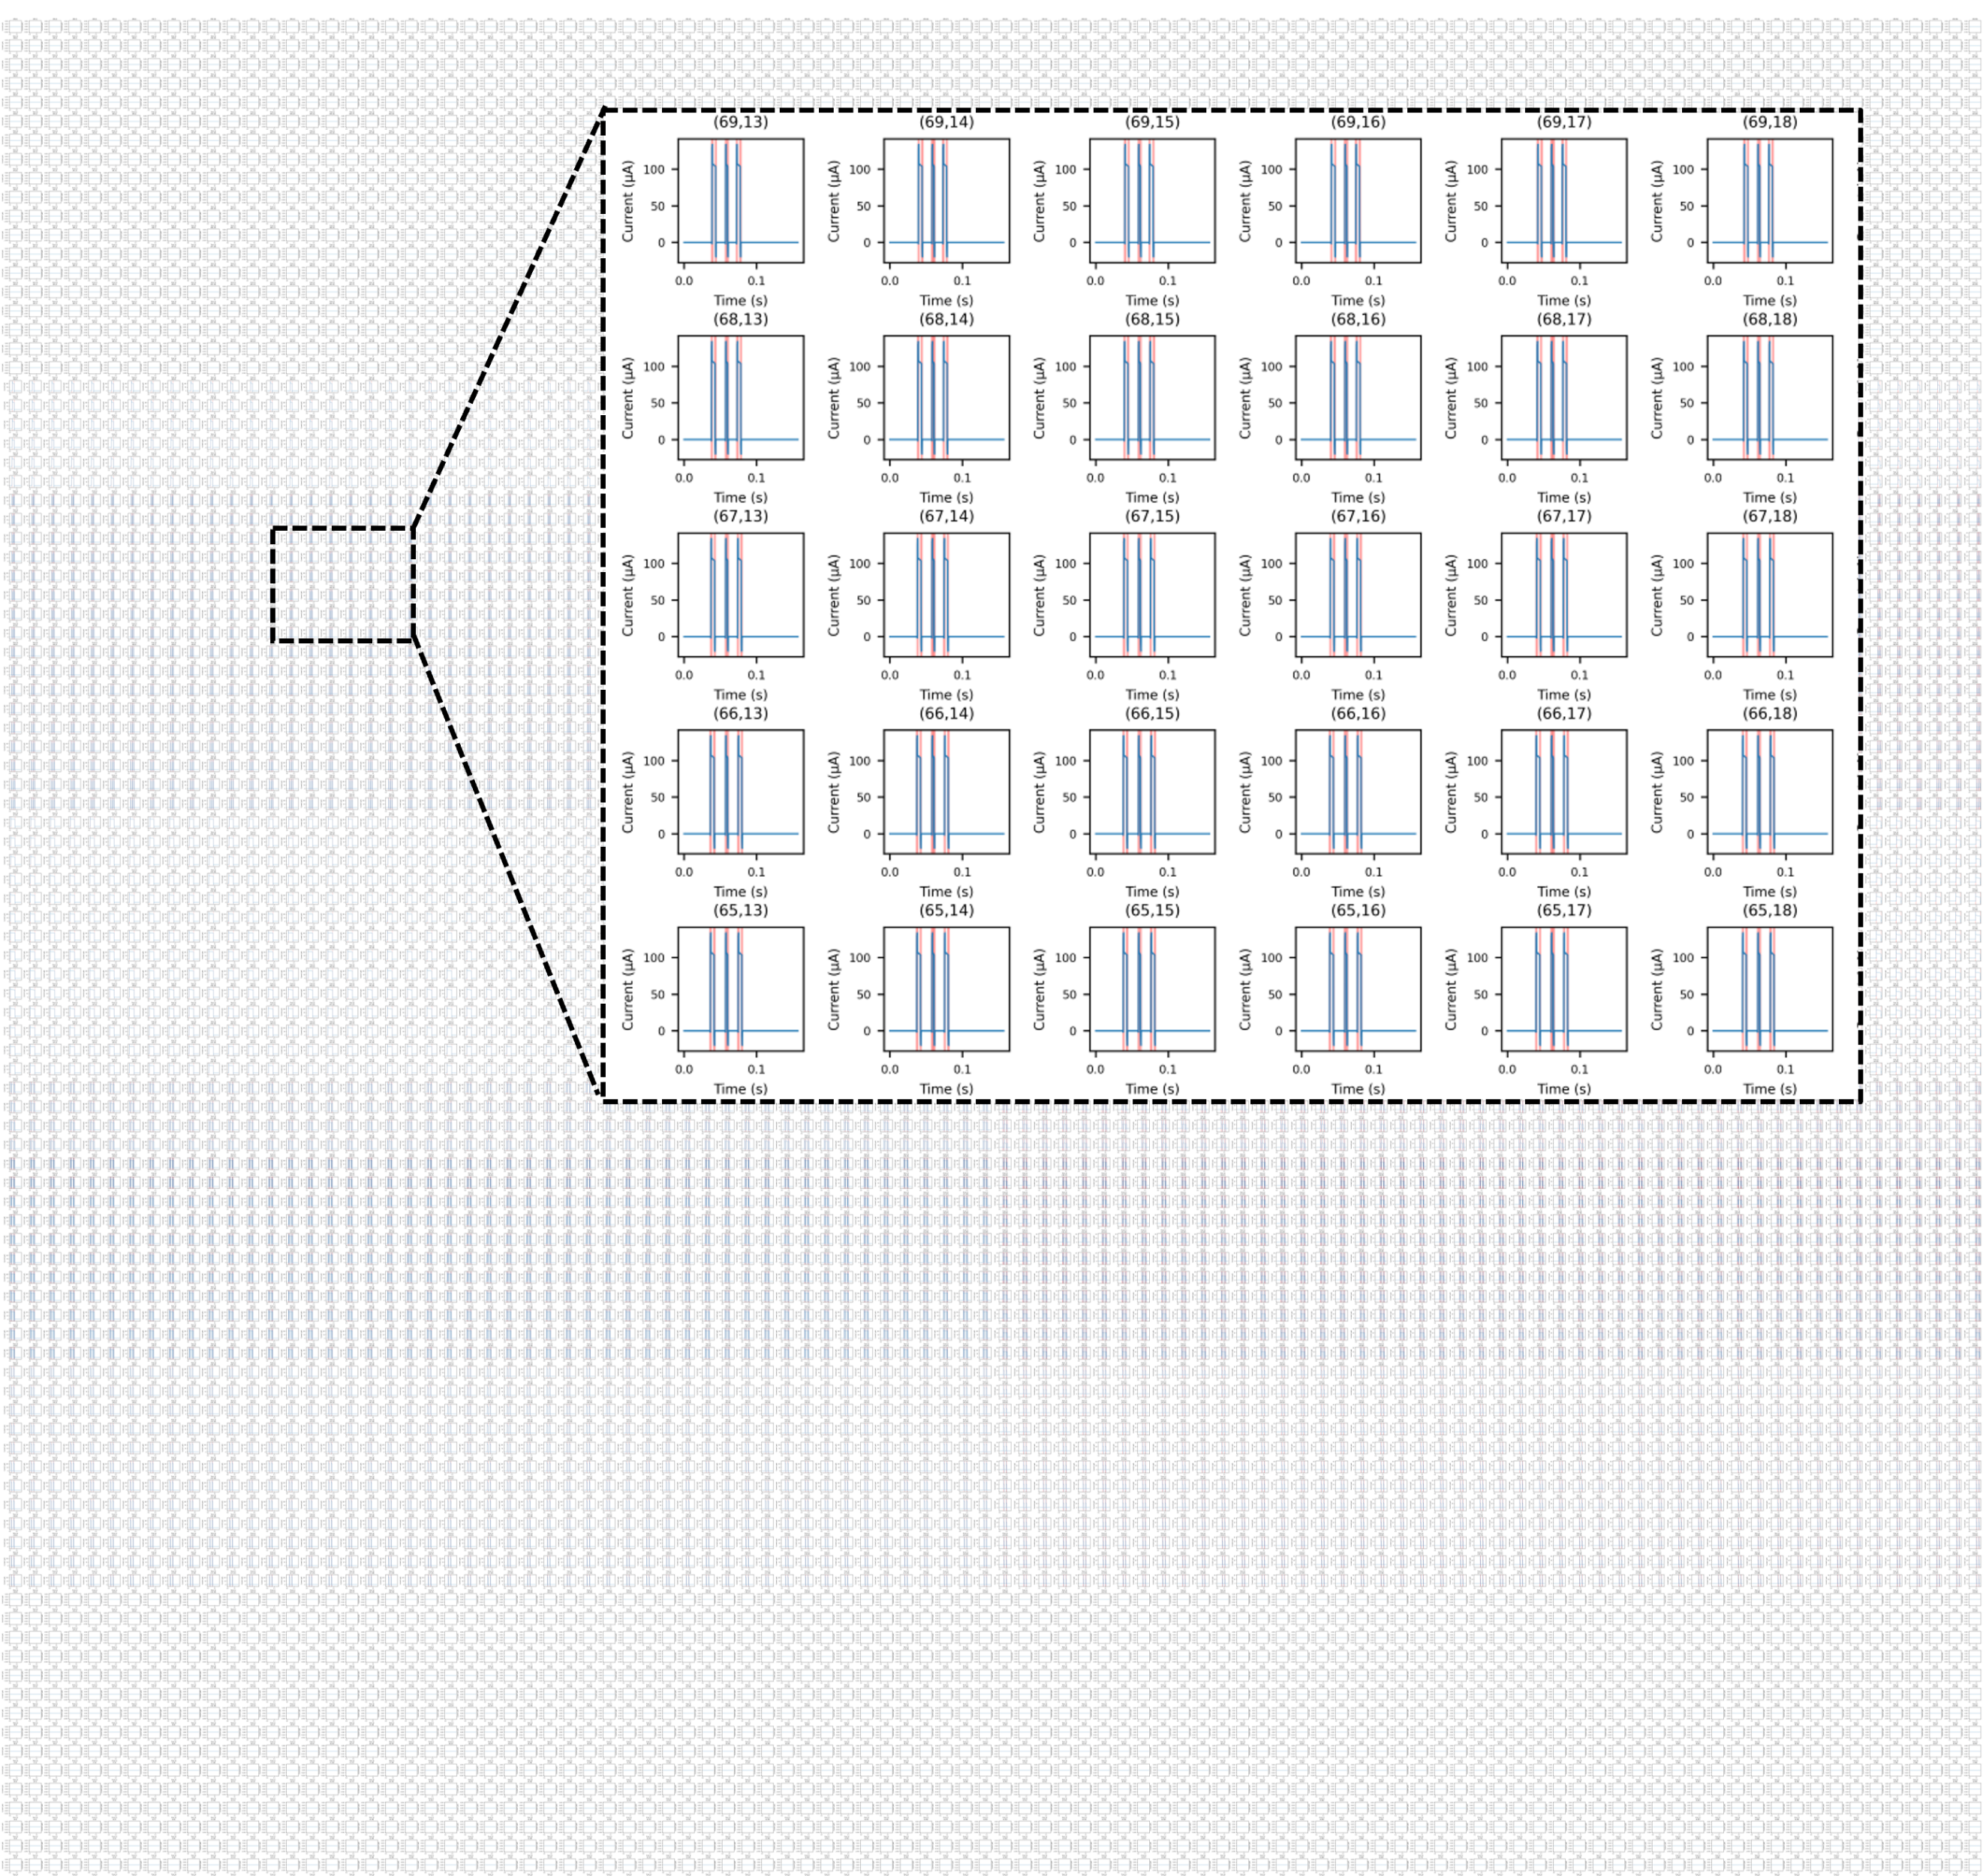


**Supplementary Fig S12. Photocurrent response of the hybrid-type photodetector array.** Each subplot shows the photocurrent response of individual pixels in the array under varying illumination conditions, highlighting the characteristic waveforms that occur as the object enters and leaves each pixel.


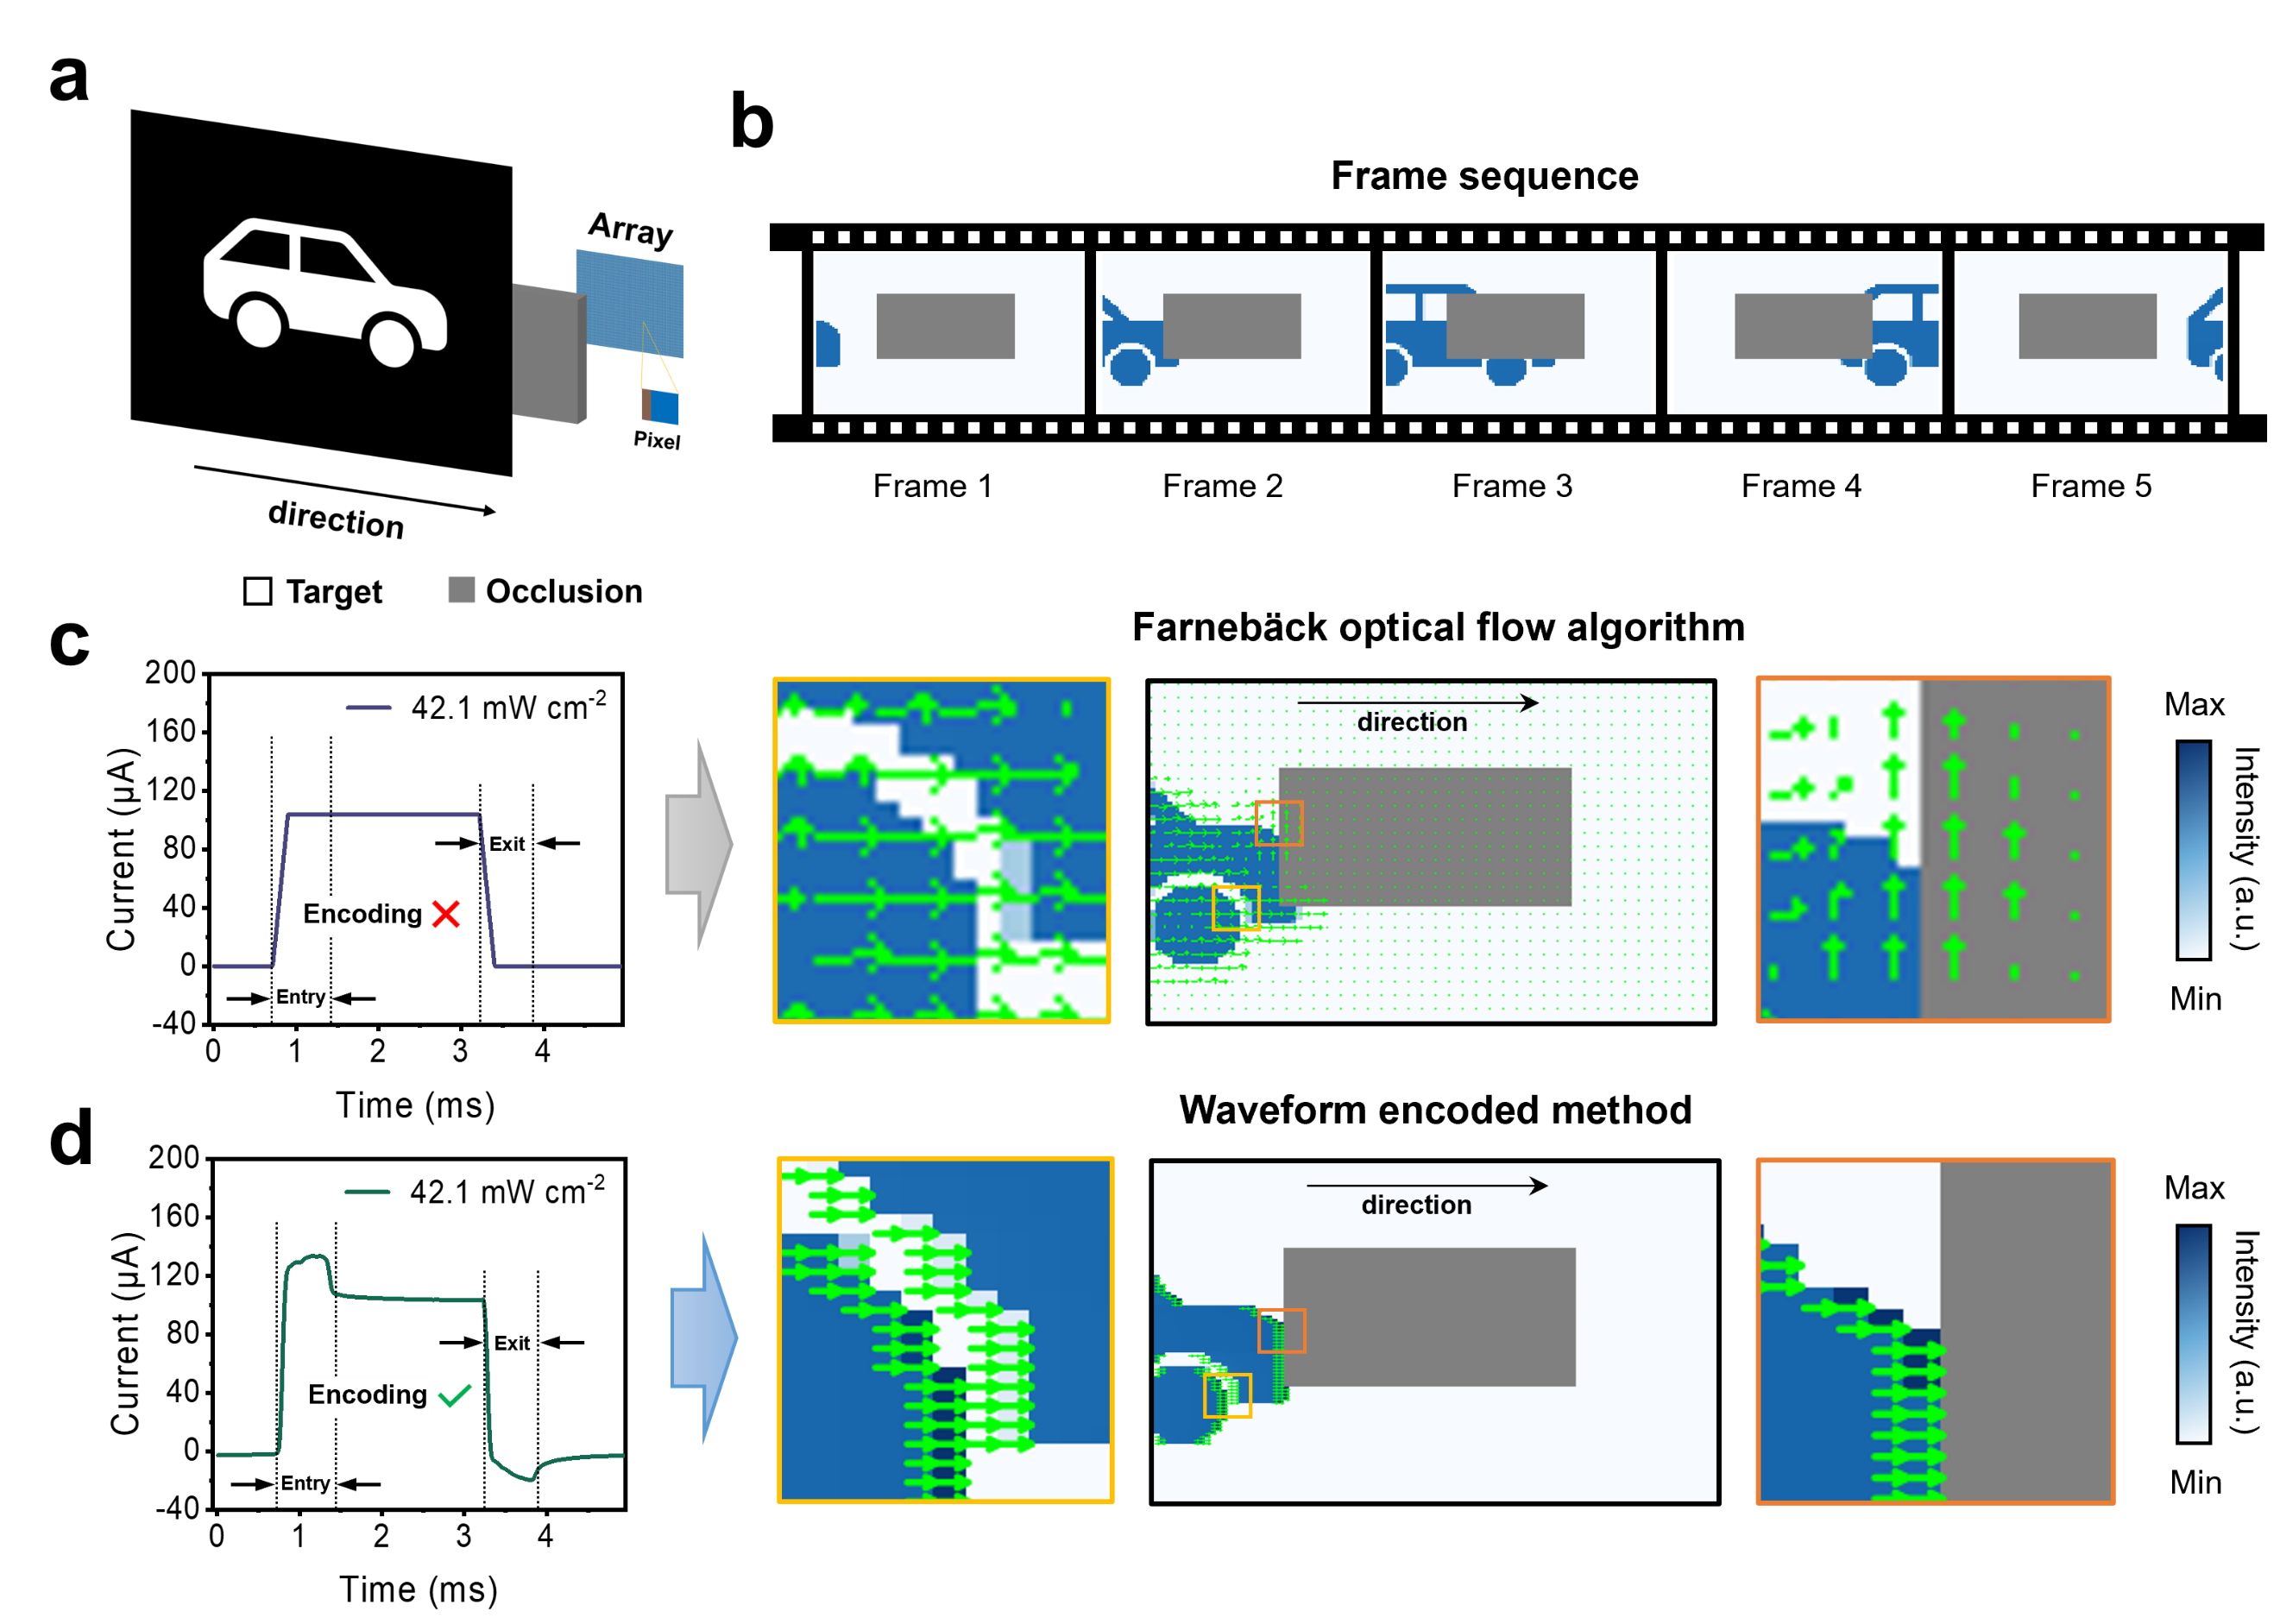


**Supplementary Fig S13. Optical flow estimation under occlusion scenario. a** Schematic illustration of imaging under occlusion condition. **b** Frame sequence during the motion of vehicle. **c** Sustained response curve and the corresponding optical flow estimated using the conventional Farnebäck algorithm. **d** Hybrid response curve and the corresponding optical flow estimated using hybrid-type photodetector.

**Supplementary Table 1. Correspondence between chopper frequency and blade speed.** The blade speed was calculated using v=2πrf, where r is the distance between the rotation center and the light beam, and f is the operating frequency of the chopper.

| Frequency/Hz | 5 | 40 | 200 | 400 | 800 |
| --- | --- | --- | --- | --- | --- |
| Speed/ (m s-1) | 0.2 | 1.5 | 7.3 | 14.7 | 29.3 |

**Supplementary Note 1. Traditional optical flow algorithm.**

The early optical flow estimation algorithms are fundamentally based on the brightness constancy assumption, which states that the brightness of a pixel remains unchanged as it moves between two consecutive frames. A pixel located at position (x, y) in frame t moves to position in frame over a short time interval . According to the brightness constancy assumption, this relationship can be mathematically expressed as:

To solve the above equation, the Lucas–Kanade (LK) algorithm1 assumes that the displacements and between two consecutive frames are sufficiently small, allowing the left-hand side of Eq. (1.1) to be approximated using a first-order Taylor expansion:

By eliminating from both sides of Eq. (1.2), one obtains the optical flow constraint equation:

Since denotes the pixel position, the quantities represent the pixel velocity components. Let and denote the horizontal and vertical velocity components, respectively. Equation (1.3) can then be simplified as:

Equation (1.4) represents the mathematical foundation of the optical flow problem and establishes a constraint for the motion of each pixel in an image. Here, Ix and Iy denote the partial derivatives of the image intensity with respect to the spatial coordinates and , while denotes the temporal derivative of intensity with respect to time t. However, this equation presents a major challenge: although a constraint can be formed for each pixel, the equation contains two unknowns (u and v) but only one equation, making it an ill-posed (under-constrained) problem that cannot be uniquely solved with limited information.

To further elucidate this issue, Horn and Schunck2 introduced a practical interpretation known as the Aperture Problem. Since the observation of image intensity variations is confined to a small local region (e.g., a limited window or “aperture”), the obtained information can be misleading.

To overcome this ill-posed nature, the Lucas–Kanade (LK) method introduces the spatial consistency assumption, which postulates that neighboring pixels within a small window share a common motion velocity (u, v). Therefore, for each pixel within the window, identical optical flow constraint equations can be established. For instance, assuming that all pixels (P1, P2, P3, …, P25) within a 5×5 window exhibit similar motion tendencies, one can obtain 25 optical flow constraint equations while the unknowns remain two ( and ), as expressed in Eq. (1.5).

This method effectively transforms the problem into an overdetermined system of equations, in which the number of equations exceeds the number of unknowns. Consequently, it provides a mathematically feasible solution for estimating the motion velocity of each pixel.

**Supplementary Reference**

1. Lucas, B. D. & Kanade, T. An iterative image registration technique with an application to stereo vision. in *Proceedings of the 7th International Joint Conference on Artificial Intelligence - Volume 2* 674–679 (Morgan Kaufmann Publishers Inc., San Francisco, CA, USA, 1981).

2. Horn, B. K. & Schunck, B. G. Determining optical flow. *Artif. Intell.* **17**, 185–203 (1981).
